# Supplementary material for: Natural Products Produced in Culture by Biosynthetically Talented Salinispora arenicola Strains Isolated from Northeastern and South Pacific Marine Sediments
Source: MDPI journal article supplement (doi:10.3390/molecules27113569), 2022-06-02
Supplement: s1 [file s1]

# Supplementary Materials

## Natural Products Produced in Culture by Biosynthetically Talented *Salinispora arenicola* Strains Isolated from Northeastern and South Pacific Marine Sediments

David E. Williams <sup>1,†</sup>, Kalindi D. Morgan <sup>1,2,3,†</sup>, Doralyn S. Dalisay <sup>4</sup>, Teatulohi Matainaho <sup>5</sup>, Elodie Perrachon <sup>1</sup>, Noemie Viller <sup>1</sup>, Mailys Delcroix <sup>1</sup>, Jeanne Gauchot <sup>1</sup>, Haruka Niikura <sup>2</sup>, Brian O. Patrick <sup>2</sup>, Katherine S. Ryan <sup>2,\*</sup> and Raymond J. Andersen <sup>1,\*</sup>

<sup>1</sup> Departments of Chemistry and Earth, Ocean and Atmospheric Sciences, University of British Columbia, Vancouver, BC V6T 1Z1, Canada; davewill@chem.ubc.ca (D.E.W.); elodie.perrachon@ensiacet.fr (E.P.); noemie.viller@ensiacet.fr (N.V.); mailys.delcroix@ensiacet.fr (M.D.); jeanne.gauchot@ensiacet.fr (J.G.)

<sup>2</sup> Department of Chemistry, University of British Columbia, Vancouver, BC V6T 1Z1, Canada; harukaniikura13826@gmail.com (H.N.); bpatrick@chem.ubc.ca (B.O.P.); ksryan@chem.ubc.ca (K.S.R.)

<sup>3</sup> Department of Chemistry and Biochemistry, University of Northern British Columbia, Prince George, BC V2N 4Z9, Canada; kalindi.morgan@unbc.ca (K.D.M.)

<sup>4</sup> Center for Chemical Biology and Biotechnology (C2B2), Department of Biology, College of Liberal Arts, Sciences and Education, University of San Agustin, Iloilo, 5000, Philippines; ddalisay@usa.edu.ph

<sup>5</sup> School of Medicine and Health Sciences, University of Papua New Guinea, P.O. Box 5623, Boroko, NCD, Papua New Guinea; lmatainaho@yahoo.com

\* Correspondence: raymond.andersen@ubc.ca

† These authors contributed equally to this work.

### Table of contents

|             |                                                                                                                                            |
|-------------|--------------------------------------------------------------------------------------------------------------------------------------------|
| Page SI-3:  | <sup>1</sup> H NMR Spectrum of Salinorcinol ( <b>3</b> ) recorded at 600 MHz in DMSO- <i>d</i> <sub>6</sub> .                              |
| Page SI-4:  | Expanded <sup>1</sup> H NMR Spectrum of Salinorcinol ( <b>3</b> ) with peak picking recorded at 600 MHz in DMSO- <i>d</i> <sub>6</sub> .   |
| Page SI-5:  | Expanded <sup>1</sup> H NMR Spectrum of Salinorcinol ( <b>3</b> ) with peak picking recorded at 600 MHz in DMSO- <i>d</i> <sub>6</sub> .   |
| Page SI-6:  | <sup>13</sup> C NMR Spectrum of Salinorcinol ( <b>3</b> ) recorded at 150 MHz in DMSO- <i>d</i> <sub>6</sub> .                             |
| Page SI-7:  | gradCOSY60 NMR Spectrum of Salinorcinol ( <b>3</b> ) recorded at 600 MHz in DMSO- <i>d</i> <sub>6</sub> .                                  |
| Page SI-8:  | gradHSQC NMR Spectrum of Salinorcinol ( <b>3</b> ) recorded at 600 MHz in DMSO- <i>d</i> <sub>6</sub> .                                    |
| Page SI-9:  | gradHMBC NMR Spectrum of Salinorcinol ( <b>3</b> ) recorded at 600 MHz in DMSO- <i>d</i> <sub>6</sub> .                                    |
| Page SI-10: | tROESY NMR Spectrum of Salinorcinol ( <b>3</b> ) recorded at 600 MHz in DMSO- <i>d</i> <sub>6</sub> .                                      |
| Page SI-11: | <sup>1</sup> H NMR Spectrum of for Salinacetamide ( <b>4</b> ) recorded at 600 MHz in DMSO- <i>d</i> <sub>6</sub> .                        |
| Page SI-12: | Expanded <sup>1</sup> H NMR Spectrum of Salinacetamide ( <b>4</b> ) with peak picking recorded at 600 MHz in DMSO- <i>d</i> <sub>6</sub> . |
| Page SI-13: | Expanded <sup>1</sup> H NMR Spectrum of Salinacetamide ( <b>4</b> ) with peak picking recorded at 600 MHz in DMSO- <i>d</i> <sub>6</sub> . |
| Page SI-14: | <sup>13</sup> C NMR Spectrum of Salinacetamide ( <b>4</b> ) recorded at 150 MHz in DMSO- <i>d</i> <sub>6</sub> .                           |
| Page SI-15: | gradCOSY60 NMR Spectrum of Salinacetamide ( <b>4</b> ) recorded at 600 MHz in DMSO- <i>d</i> <sub>6</sub> .                                |
| Page SI-16: | gradHSQC NMR Spectrum of Salinacetamide ( <b>4</b> ) recorded at 600 MHz in DMSO- <i>d</i> <sub>6</sub> .                                  |
| Page SI-17: | gradHMBC NMR Spectrum of Salinacetamide ( <b>4</b> ) recorded at 600 MHz in DMSO- <i>d</i> <sub>6</sub> .                                  |
| Page SI-18: | tROESY NMR Spectrum of Salinacetamide ( <b>4</b> ) recorded at 600 MHz in DMSO- <i>d</i> <sub>6</sub> .                                    |
| Page SI-19: | grad <sup>15</sup> N-HSQC NMR Spectrum of Salinacetamide ( <b>4</b> ) recorded at 600 MHz in DMSO- <i>d</i> <sub>6</sub> .                 |

|             |                                                                                                                                         |
|-------------|-----------------------------------------------------------------------------------------------------------------------------------------|
| Page SI-20: | <sup>1</sup> H NMR Spectrum of Salinisporamine ( <b>5</b> ) in the presence of TFA recorded at 600 MHz in DMSO- <i>d</i> <sub>6</sub> . |
| Page SI-21: | <sup>1</sup> H NMR Spectrum of Salinisporamine ( <b>5</b> ) recorded at 600 MHz in DMSO- <i>d</i> <sub>6</sub> .                        |
| Page SI-22: | <sup>13</sup> C NMR Spectrum of Salinisporamine ( <b>5</b> ) recorded at 150 MHz in DMSO- <i>d</i> <sub>6</sub> .                       |
| Page SI-23: | gradCOSY60 NMR Spectrum of Salinisporamine ( <b>5</b> ) recorded at 600 MHz in DMSO- <i>d</i> <sub>6</sub> .                            |
| Page SI-24: | gradHSQC NMR Spectrum of Salinisporamine ( <b>5</b> ) recorded at 600 MHz in DMSO- <i>d</i> <sub>6</sub> .                              |
| Page SI-25: | gradHMBC NMR Spectrum of Salinisporamine ( <b>5</b> ) recorded at 600 MHz in DMSO- <i>d</i> <sub>6</sub> .                              |
| Page SI-26: | tROESY NMR Spectrum of Salinisporamine ( <b>5</b> ) recorded at 600 MHz in DMSO- <i>d</i> <sub>6</sub> .                                |
| Page SI-27  |                                                                                                                                         |
| to SI-32:   | Details of the X-ray Diffraction Analysis of Salinisporamine ( <b>5</b> ).                                                              |
| Page SI-33: | Phylogenetic Tree of the <i>Salinispora</i> Genus with RJ4 4486 and RJ4 3005.                                                           |
| Page SI-34: | Chart Comparing Biosynthetic Gene Clusters Classes of RJ4 4486 and RJ4 3005.                                                            |
| Page SI-35: | MAUVE Alignments between <i>S. arenicola</i> CNS-205 rifamycin gene cluster with RJ4 4486 and RJ4 3005.                                 |

$^1\text{H}$  NMR Spectrum of Salinorcinol (**3**) recorded at 600 MHz in  $\text{DMSO}-d_6$

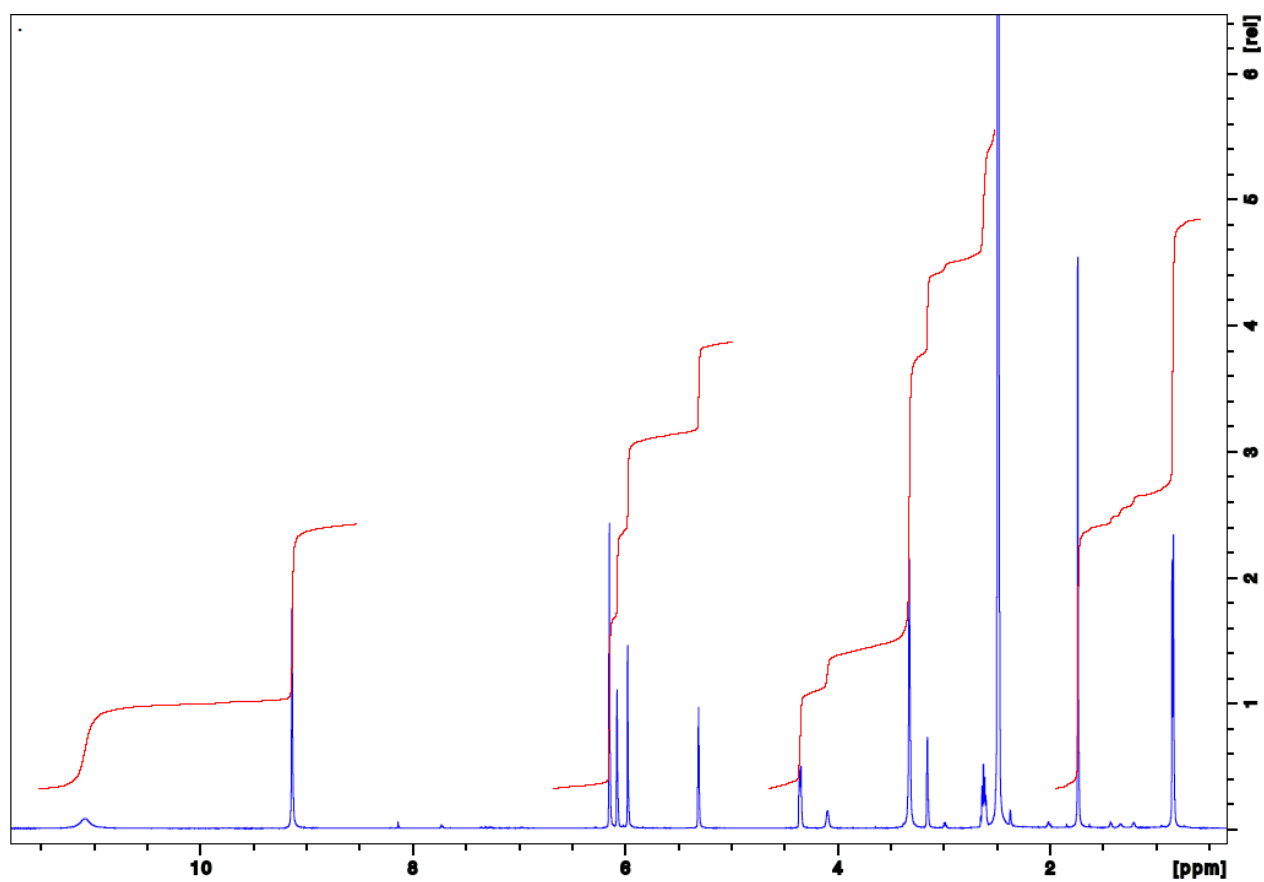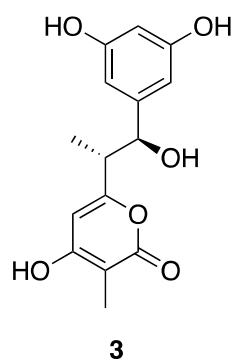

Expanded  $^1\text{H}$  NMR Spectrum of Salinorcinol (**3**) with peak picking recorded at 600 MHz in  $\text{DMSO-}d_6$

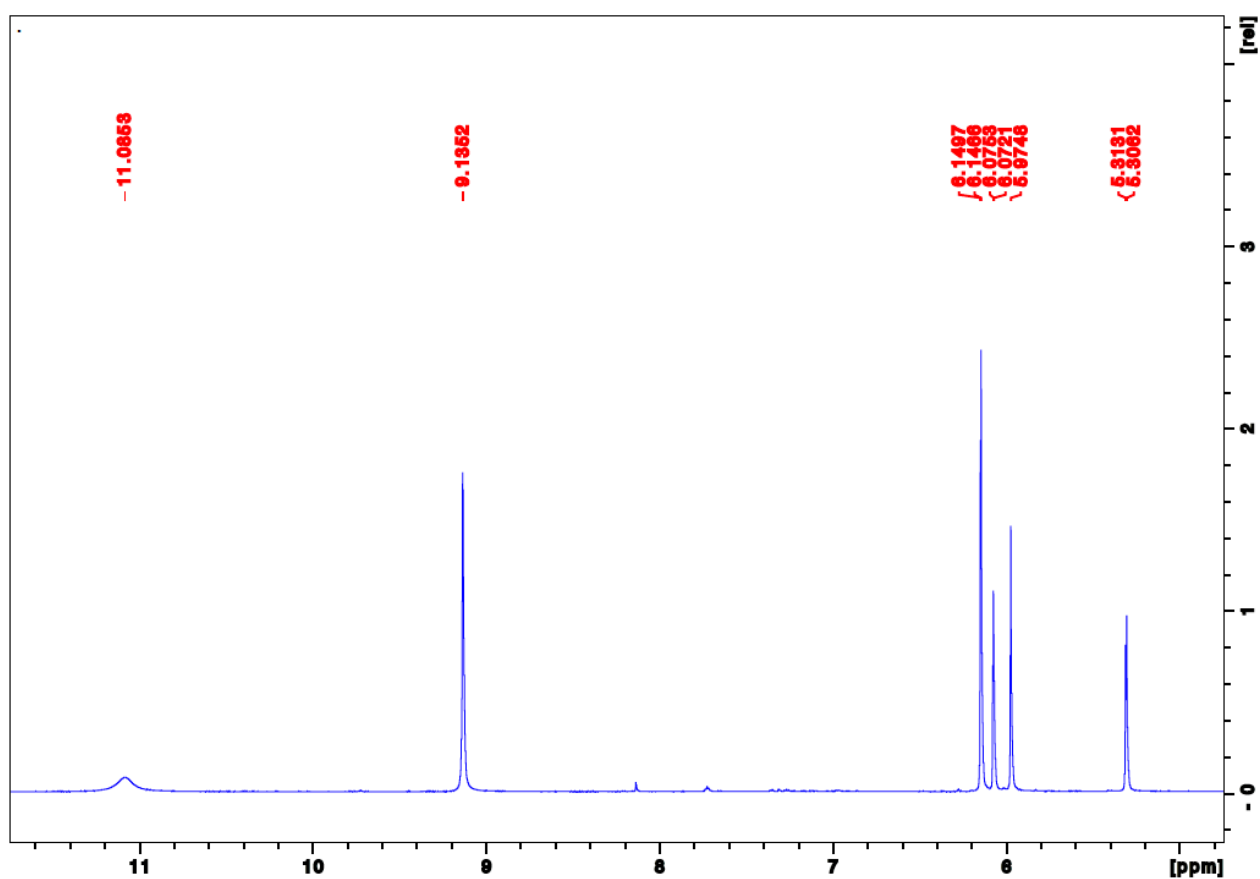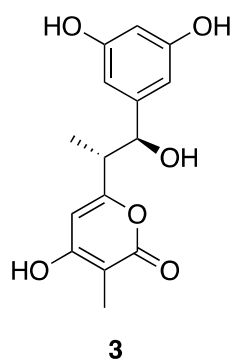

Expanded  $^1\text{H}$  NMR Spectrum of Salinorcinol (**3**) with peak picking recorded at 600 MHz in  $\text{DMSO}-d_6$

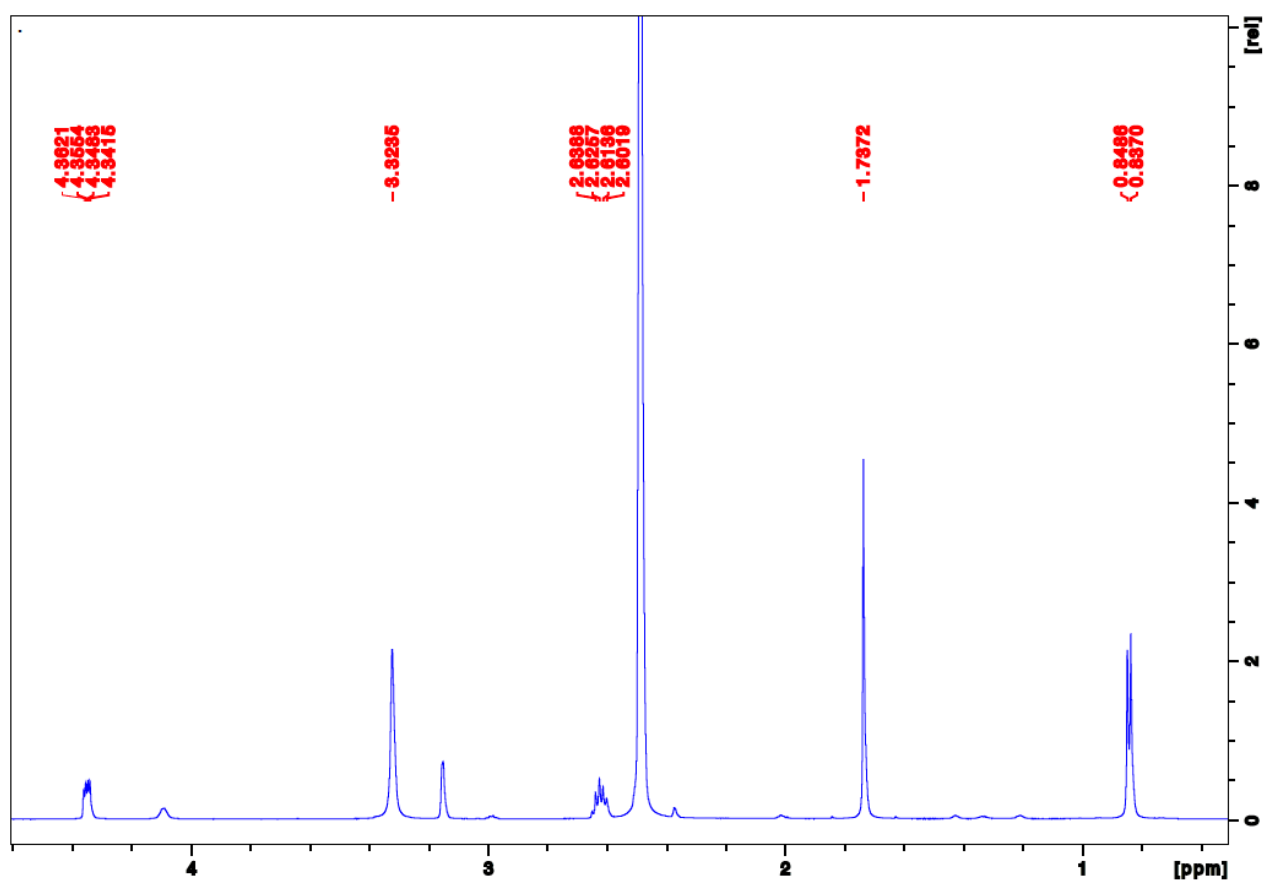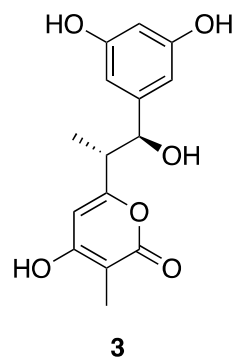

$^{13}\text{C}$  NMR Spectrum of Salinorcinol (**3**) recorded at 150 MHz in  $\text{DMSO-}d_6$

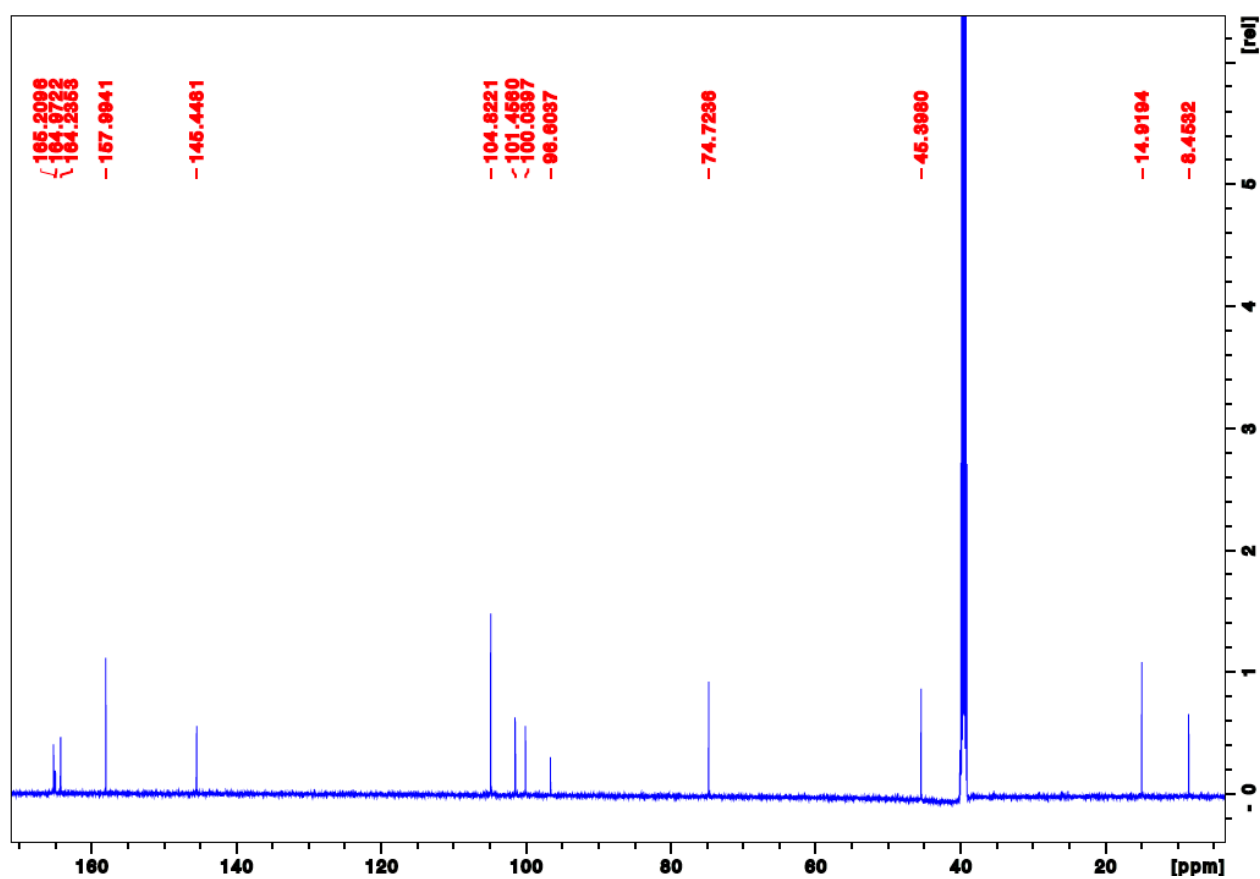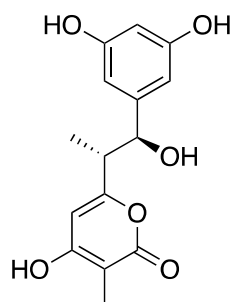

**3**

gradCOSY60 NMR Spectrum of Salinorcinol (**3**) recorded at 600 MHz in DMSO-*d*<sub>6</sub>

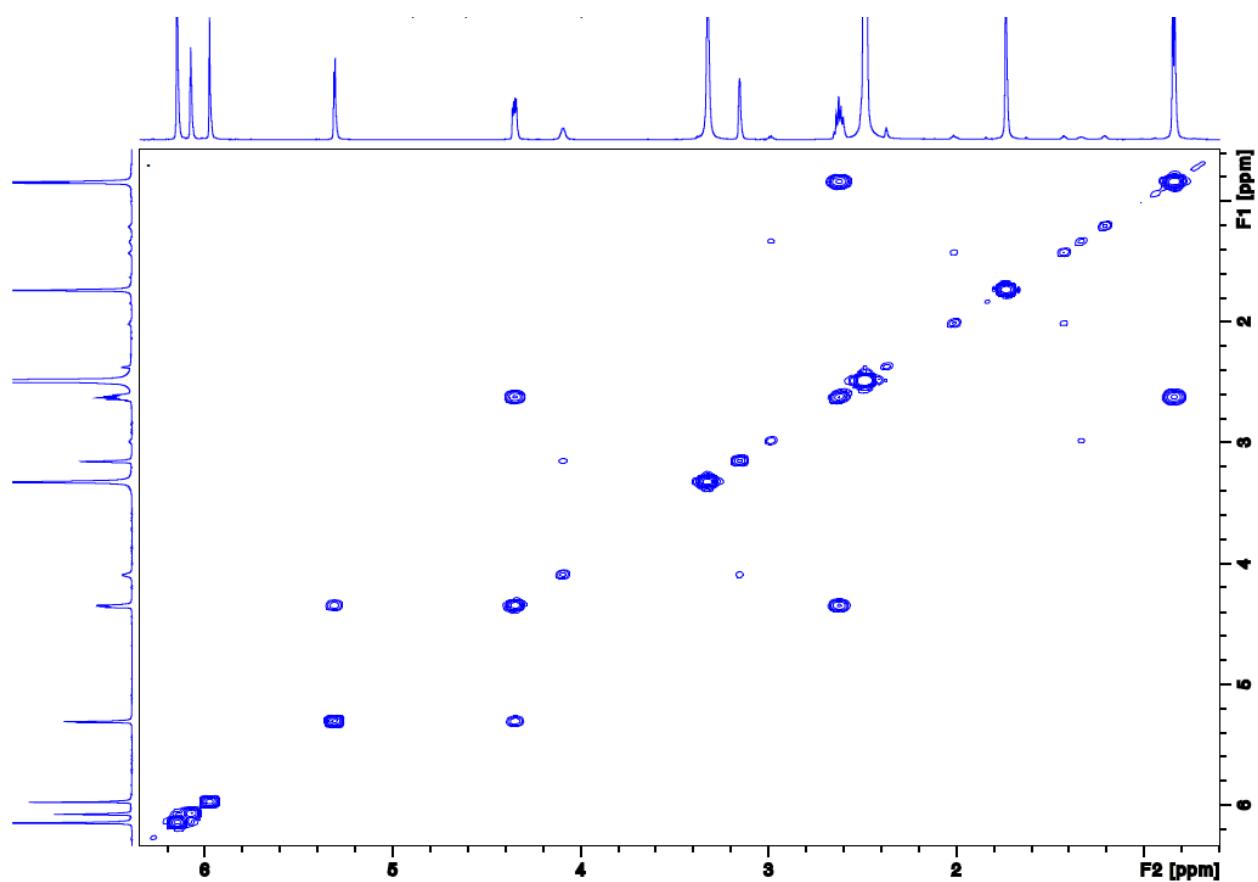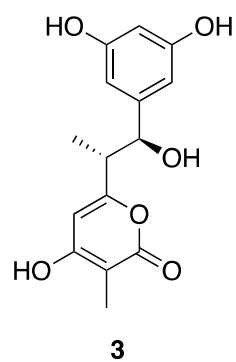

gradHSQC NMR Spectrum of Salinorcinol (**3**) recorded at 600 MHz in DMSO-*d*<sub>6</sub>

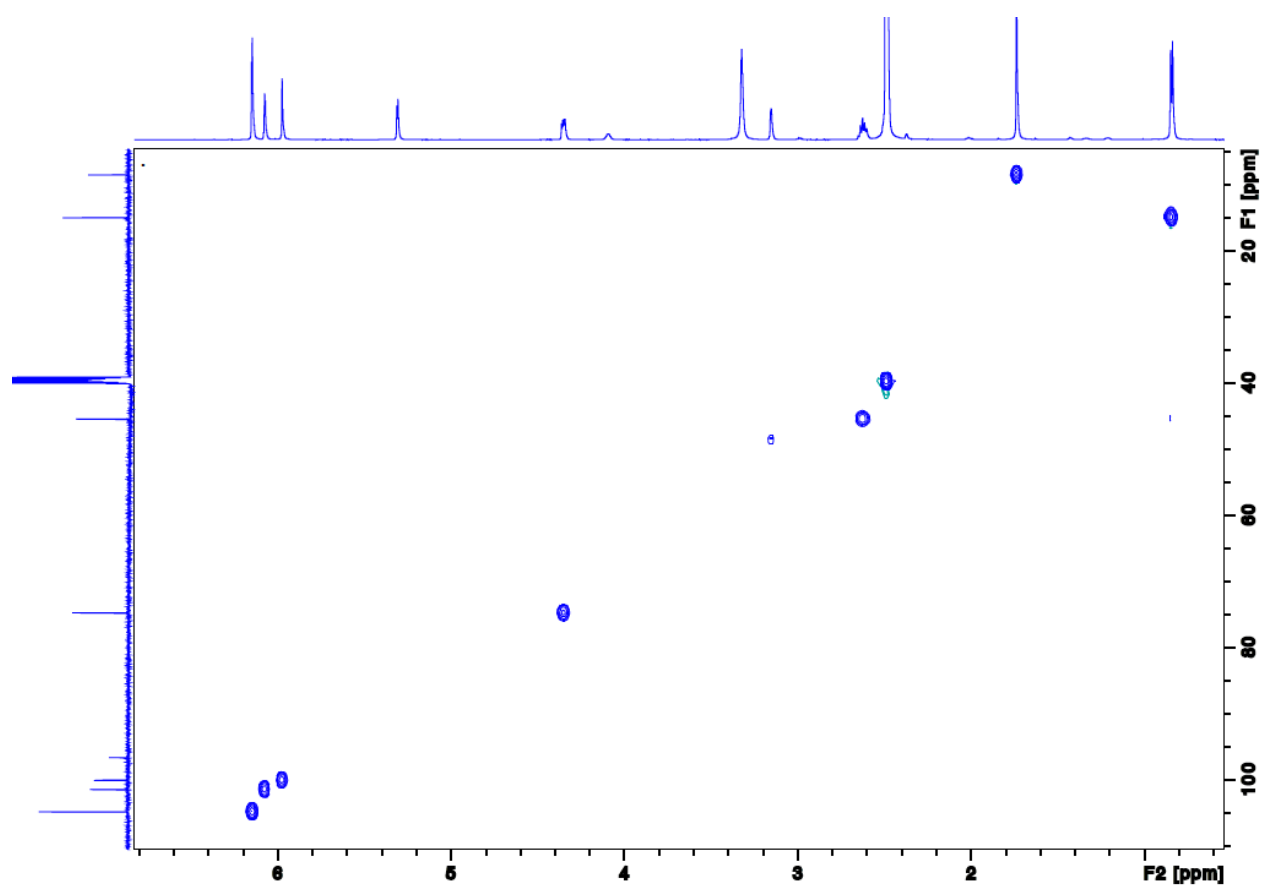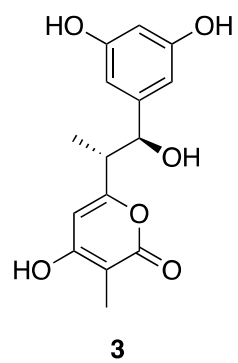



gradHMBC NMR Spectrum of Salinorcinol (**3**) recorded at 600 MHz in DMSO-*d*<sub>6</sub>

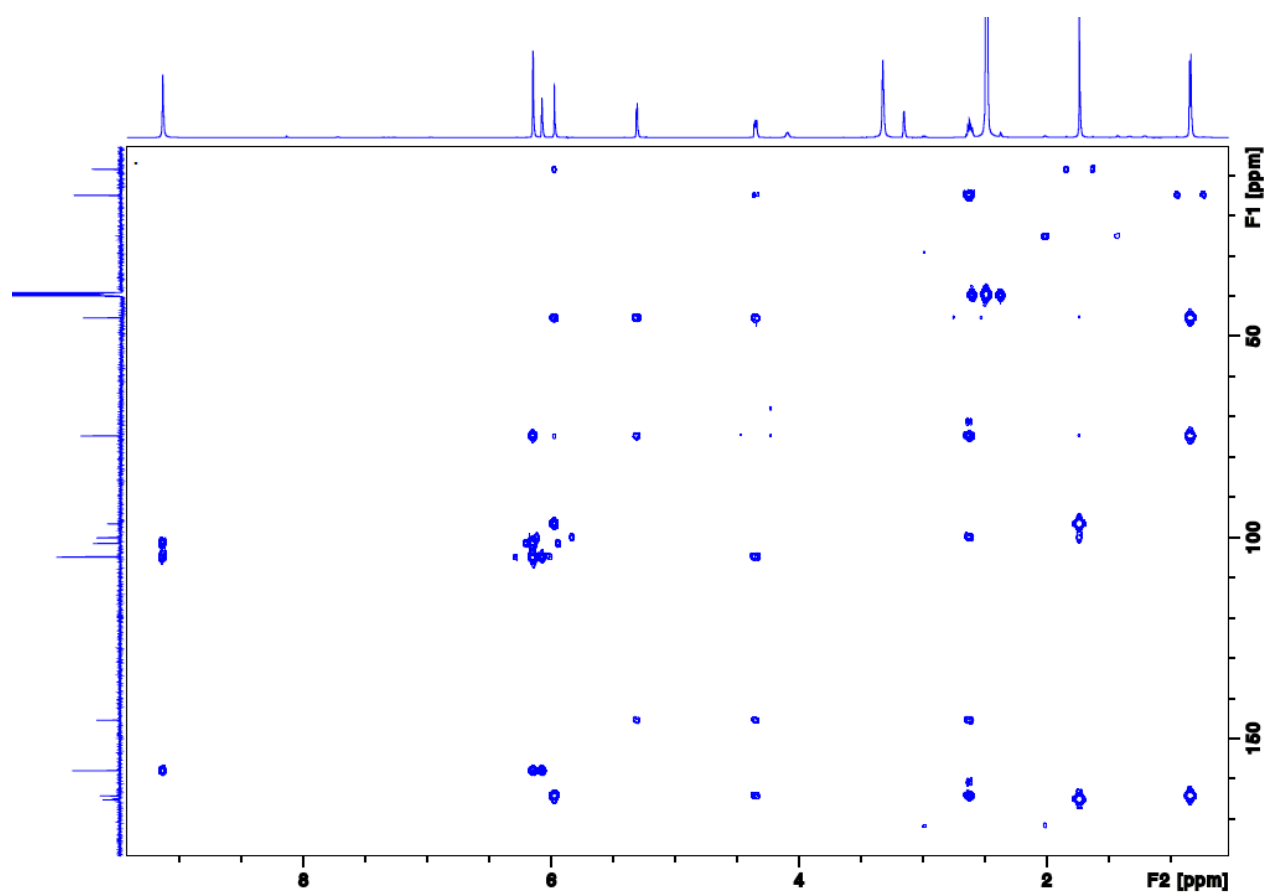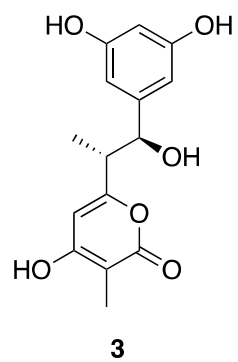

tROESY NMR Spectrum of Salinorcinol (**3**) recorded at 600 MHz in DMSO-*d*<sub>6</sub>

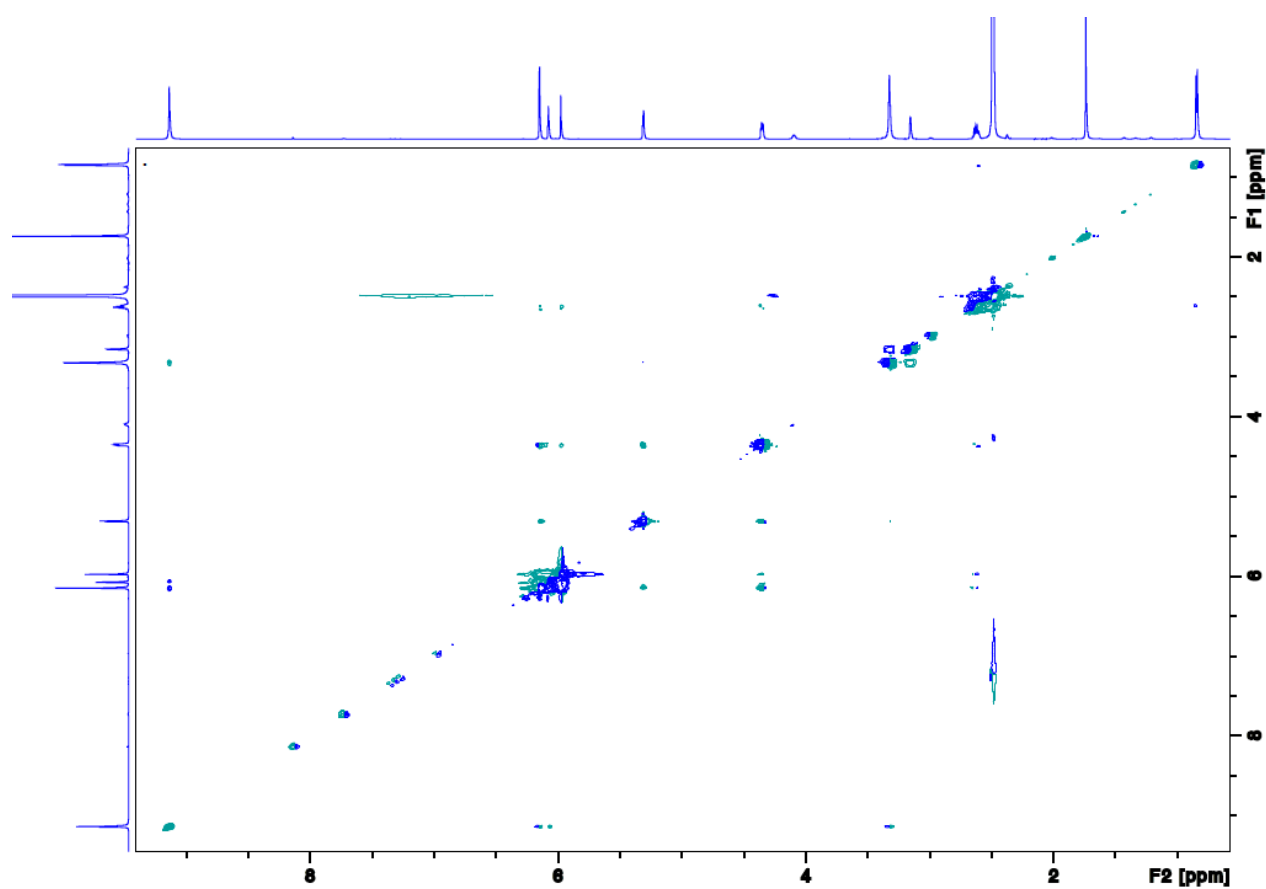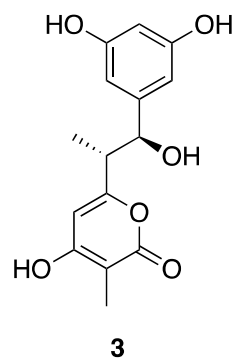

$^1\text{H}$  NMR Spectrum of for Salinacetamide (**4**) recorded at 600 MHz in  $\text{DMSO-}d_6$

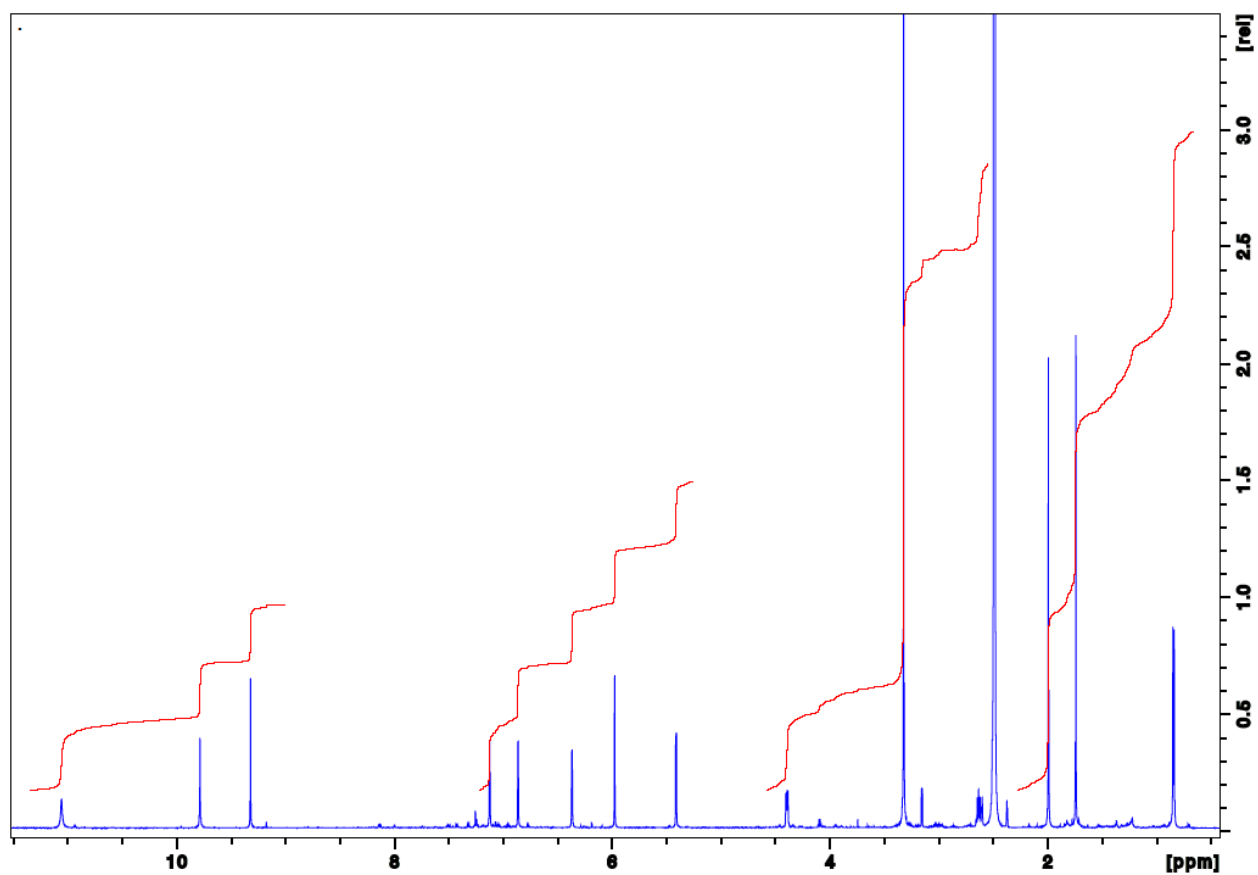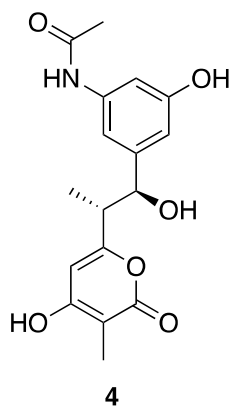

Expanded  $^1\text{H}$  NMR Spectrum of Salinacetamide (**4**) with peak picking recorded at 600 MHz in  $\text{DMSO}-d_6$

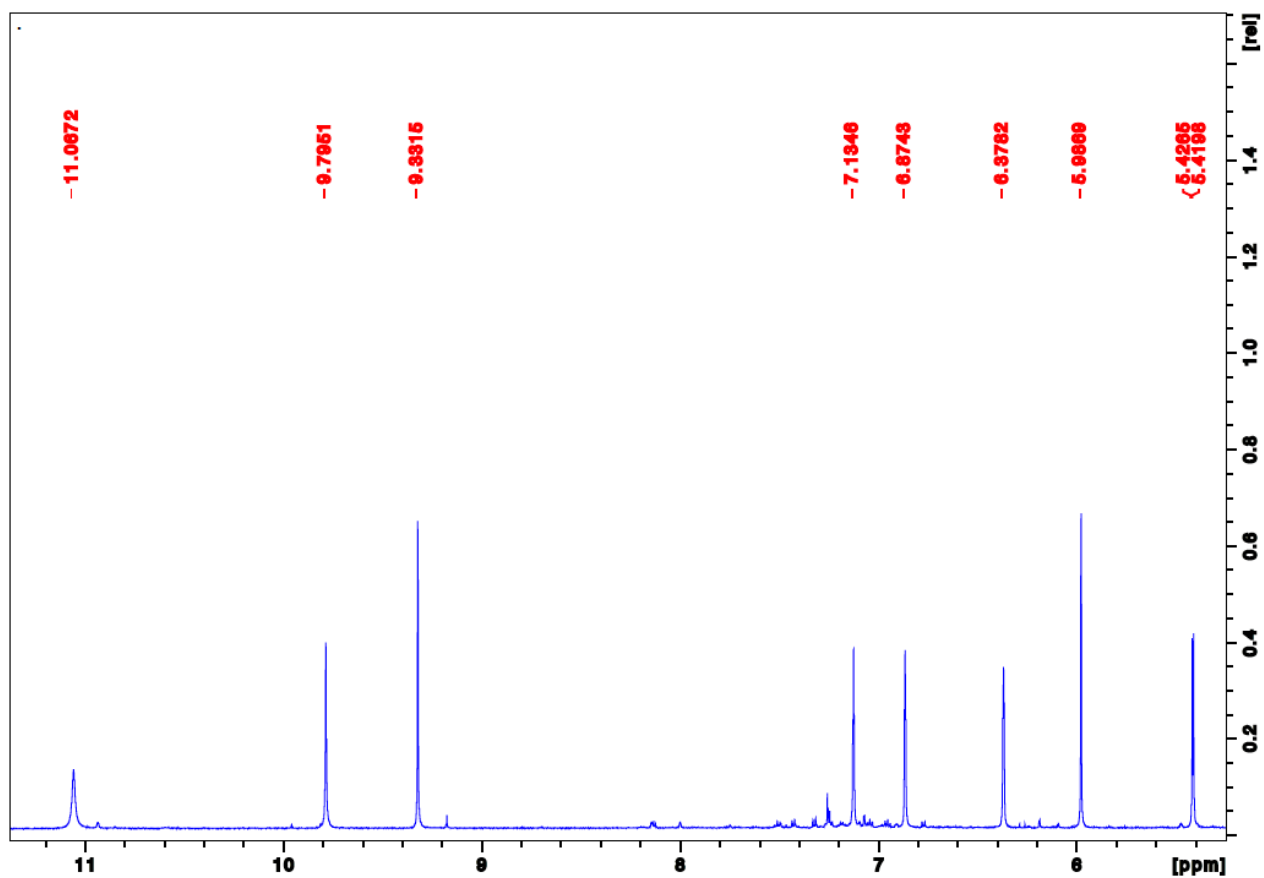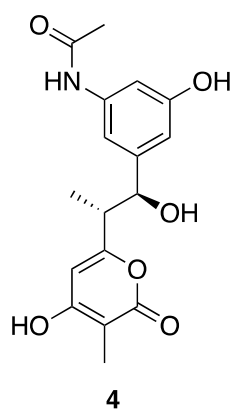

Expanded  $^1\text{H}$  NMR Spectrum of Salinacetamide (**4**) with peak picking recorded at 600 MHz in  $\text{DMSO-}d_6$

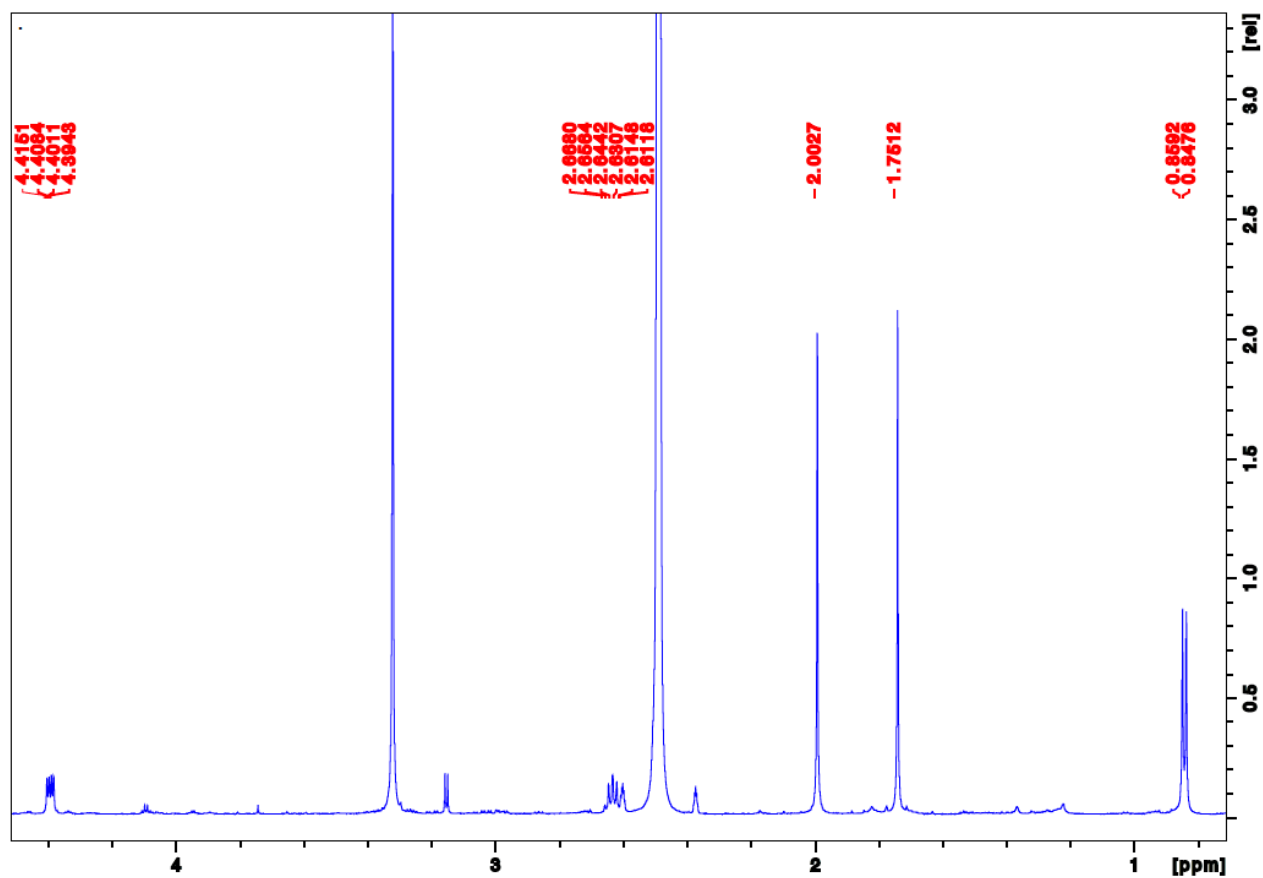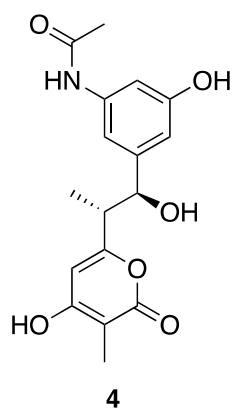

$^{13}\text{C}$  NMR Spectrum of Salinacetamide (**4**) recorded at 150 MHz in  $\text{DMSO-}d_6$

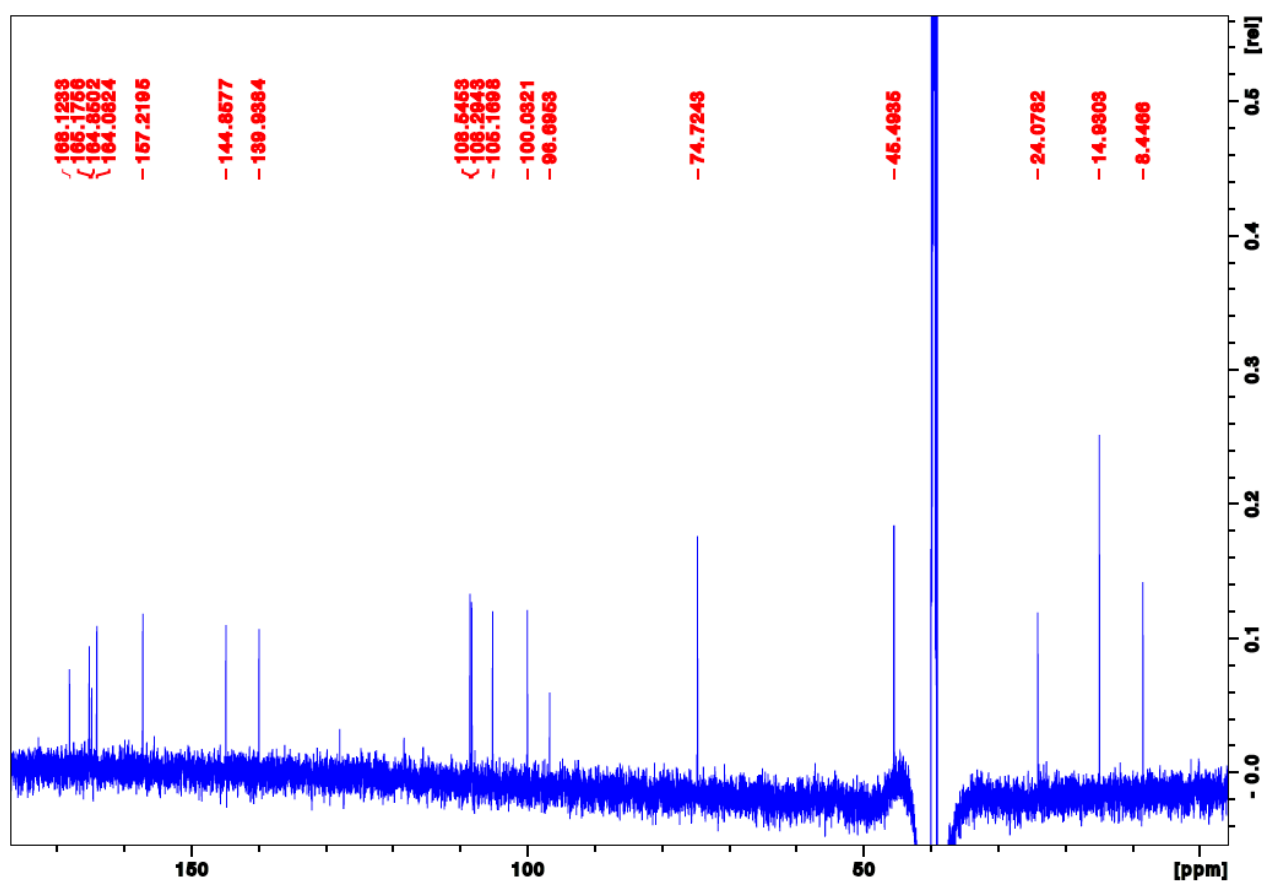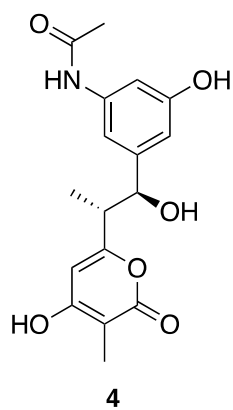

gradCOSY60 NMR Spectrum of Salinacetamide (**4**) recorded at 600 MHz in DMSO- $d_6$

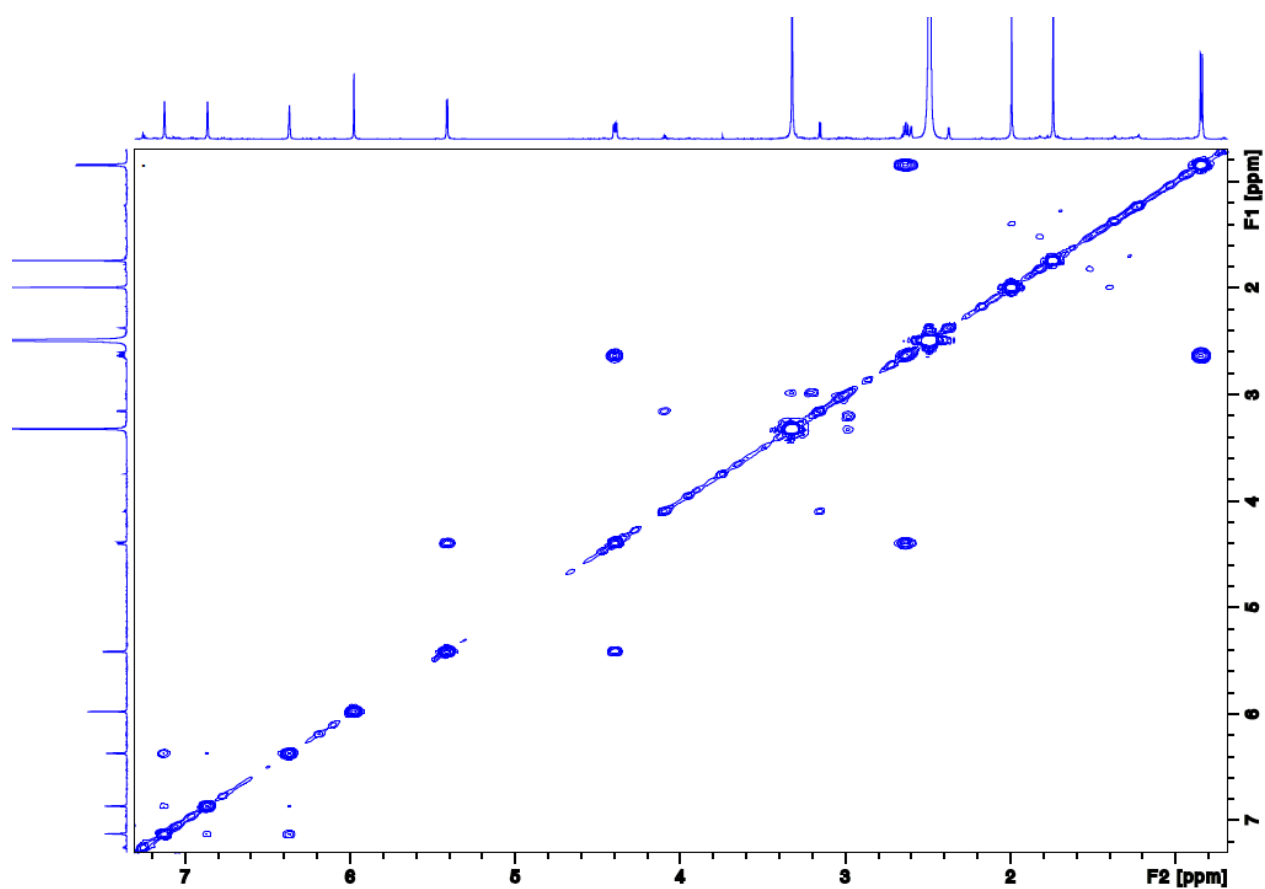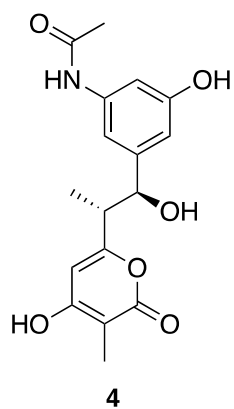

gradHSQC NMR Spectrum of Salinacetamide (**4**) recorded at 600 MHz in DMSO-*d*<sub>6</sub>

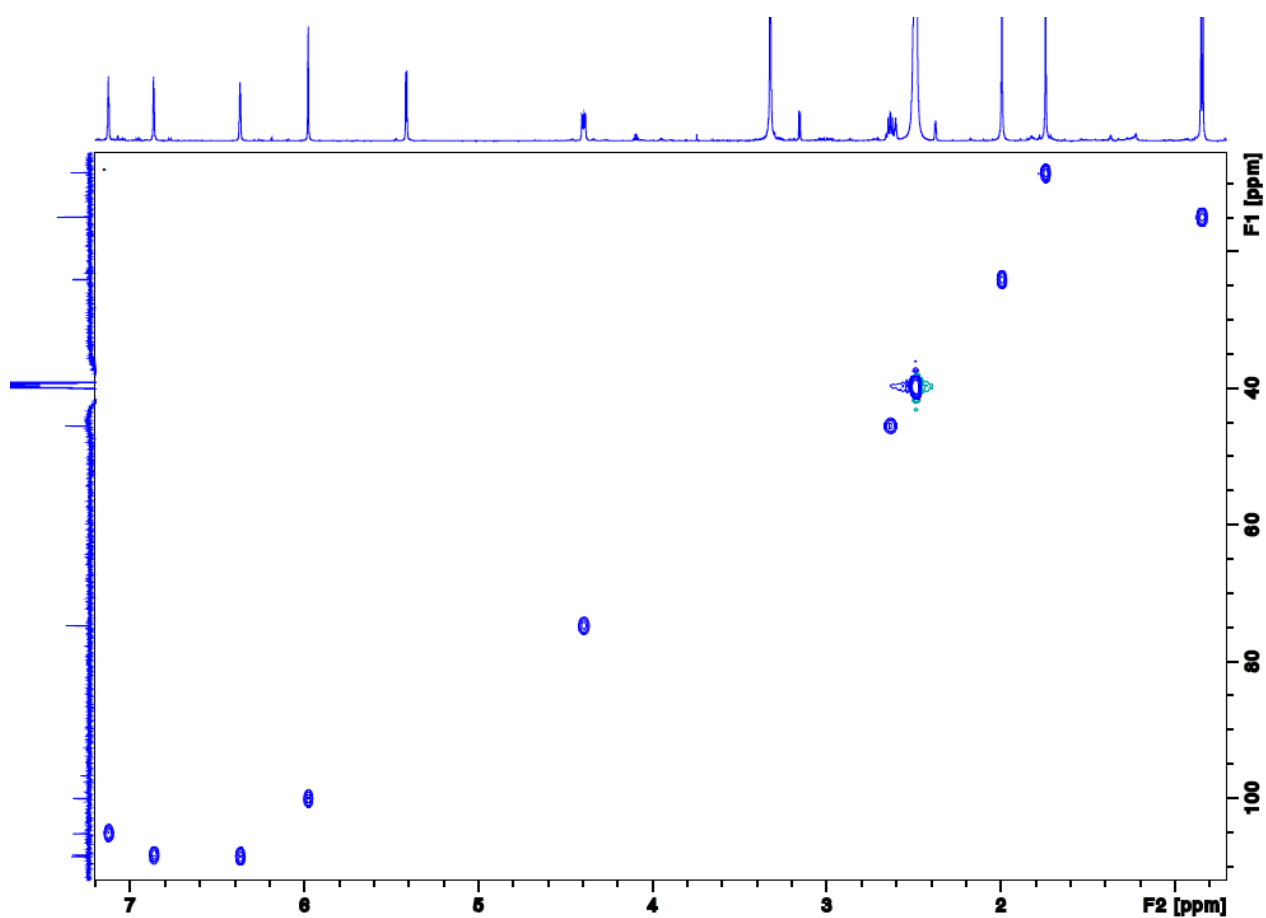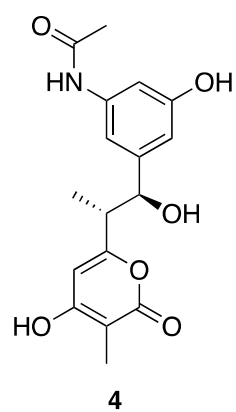



gradHMBC NMR Spectrum of Salinacetamide (**4**) recorded at 600 MHz in DMSO-*d*<sub>6</sub>

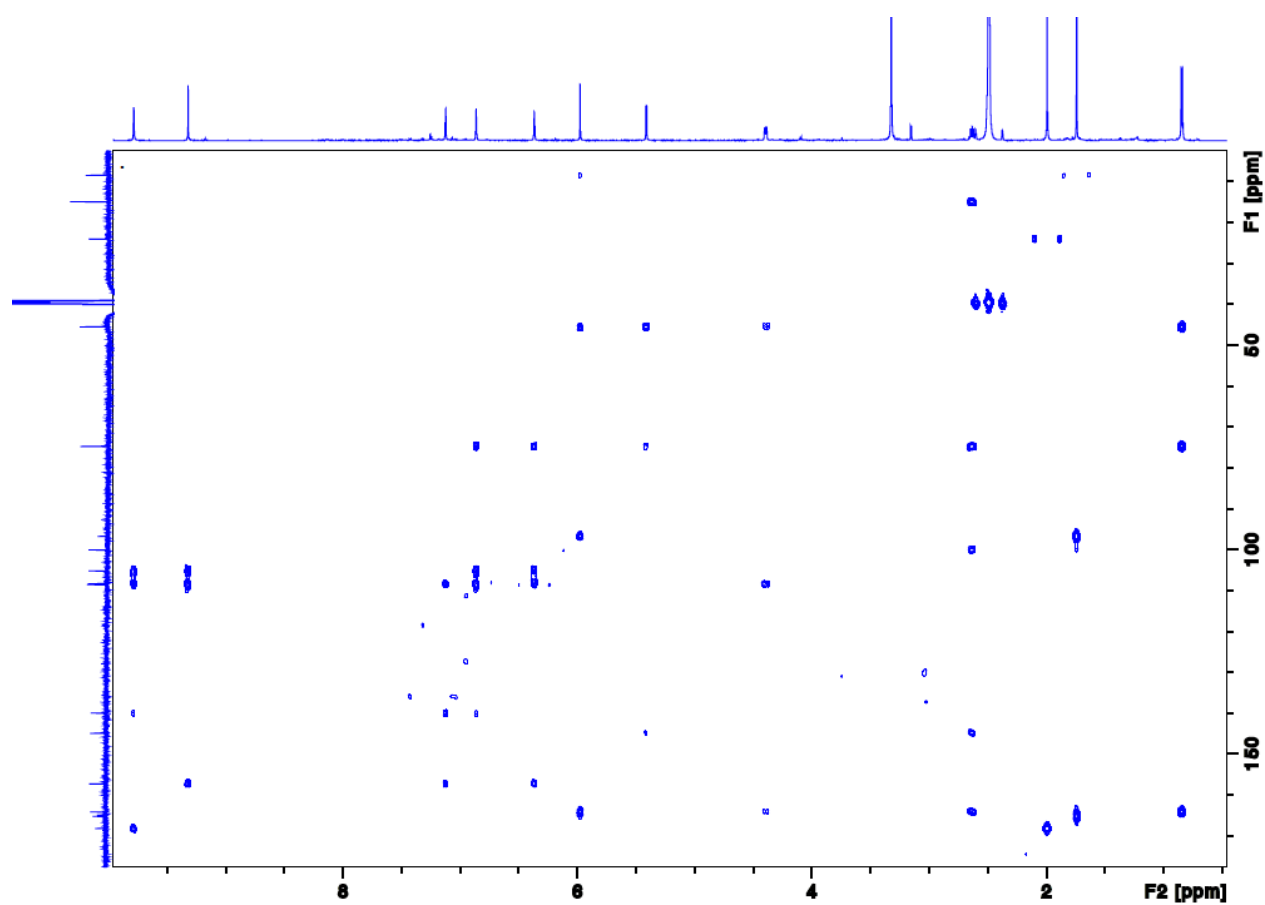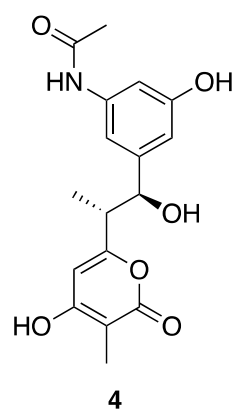

tROESY NMR Spectrum of Salinacetamide (**4**) recorded at 600 MHz in DMSO-*d*<sub>6</sub>

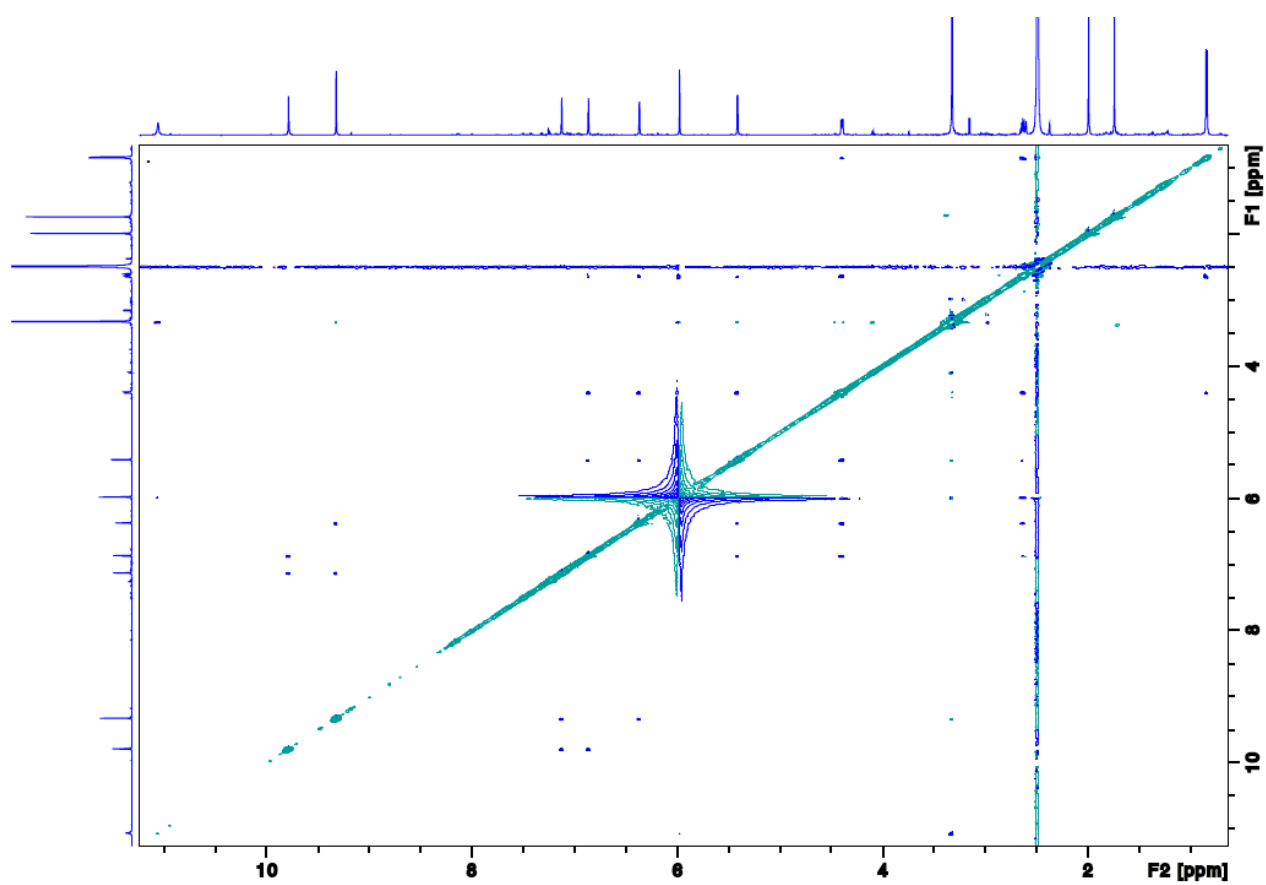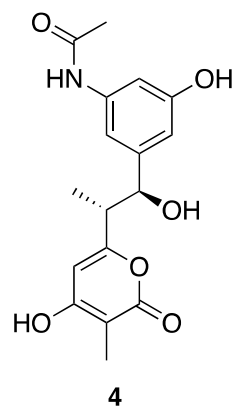

grad<sup>15</sup>N-HSQC NMR Spectrum of Salinacetamide (**4**) recorded at 600 MHz in DMSO-*d*<sub>6</sub>

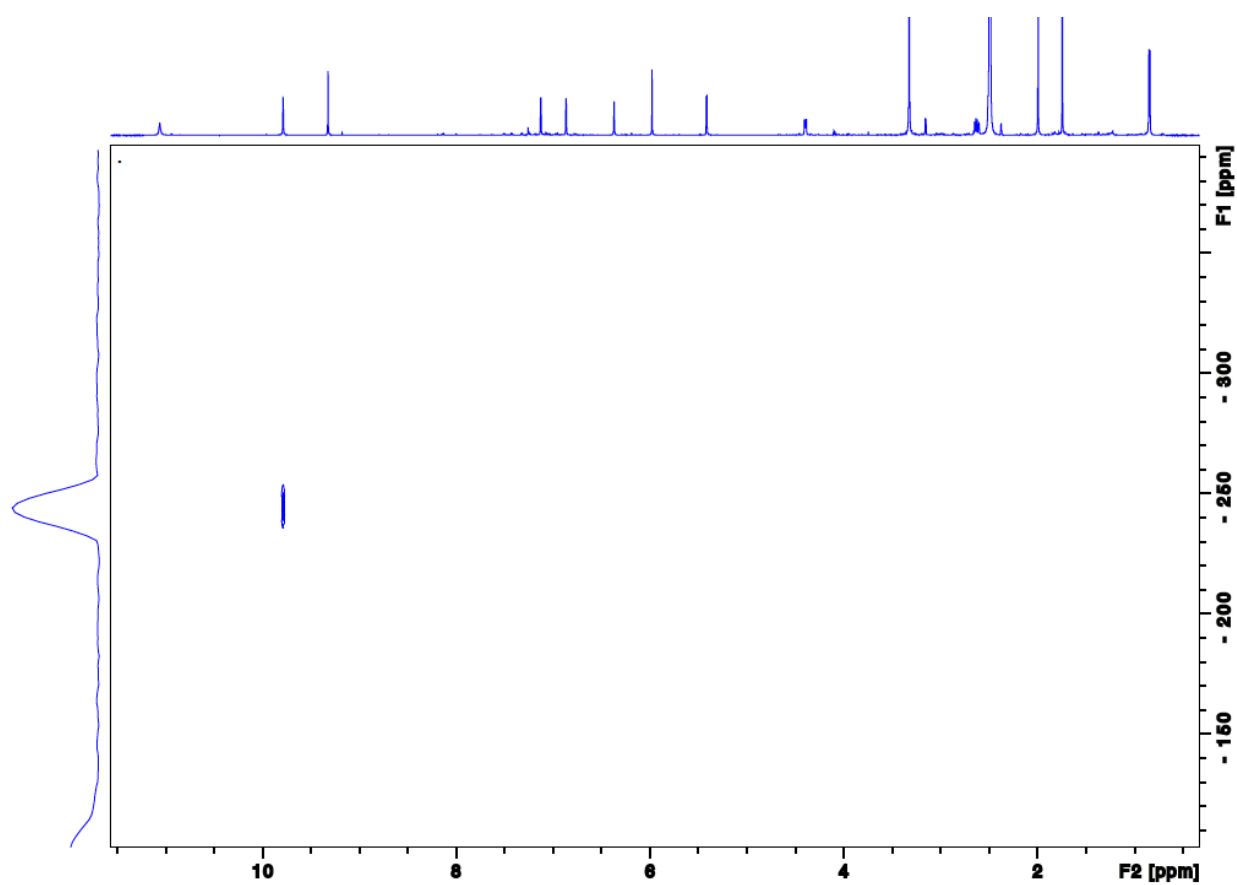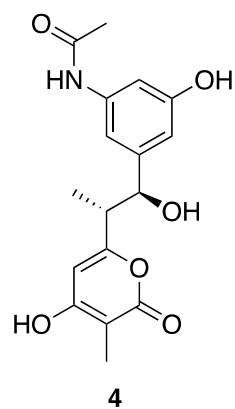

$^1\text{H}$  NMR Spectrum of Salinisporamine (**5**) in the presence of TFA recorded at 600 MHz in  $\text{DMSO-}d_6$

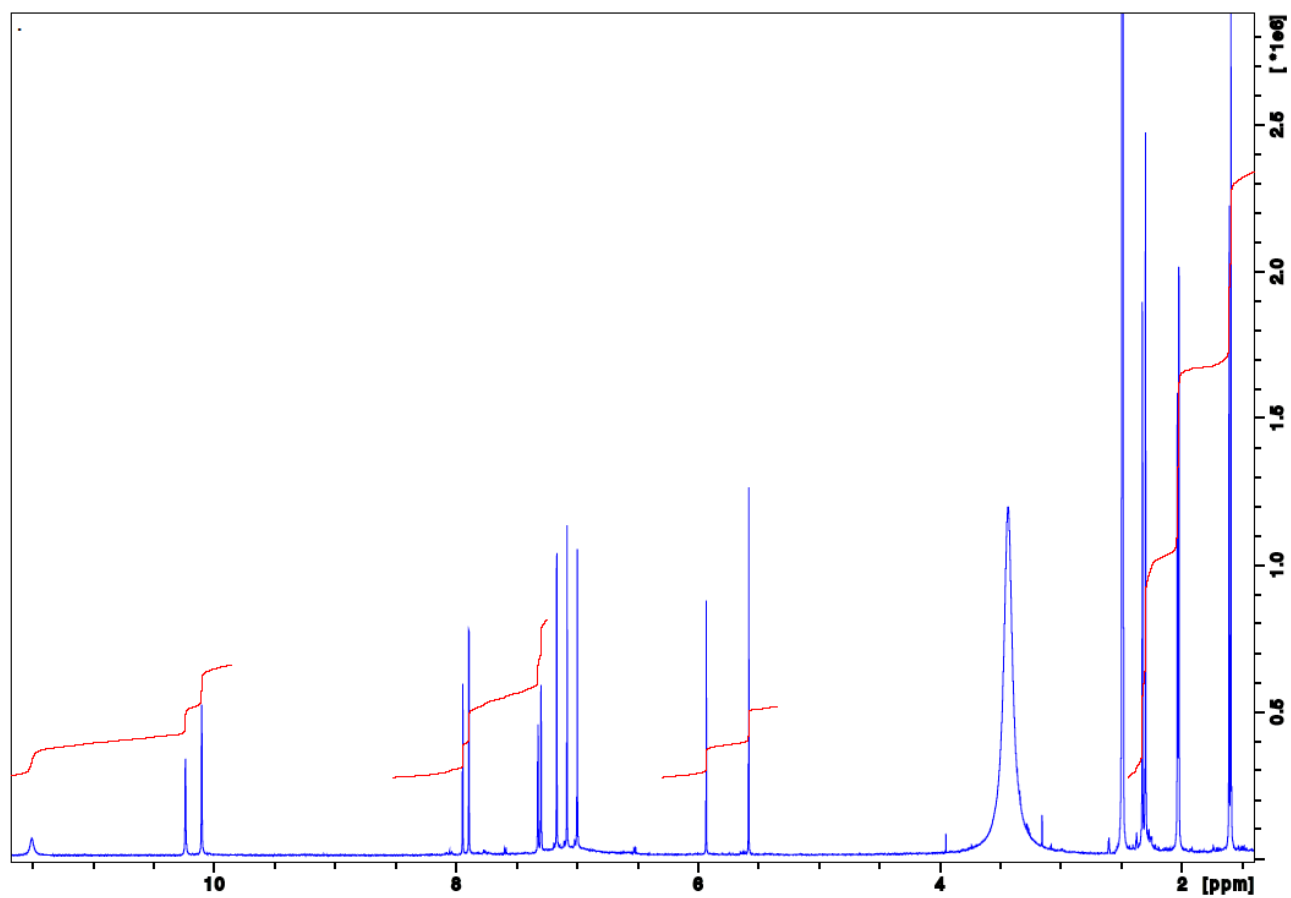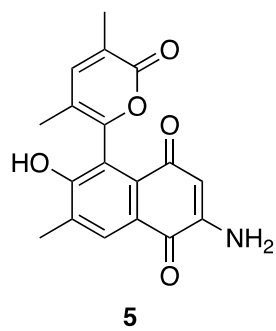

$^1\text{H}$  NMR Spectrum of Salinisporamine (**5**) recorded at 600 MHz in  $\text{DMSO}-d_6$

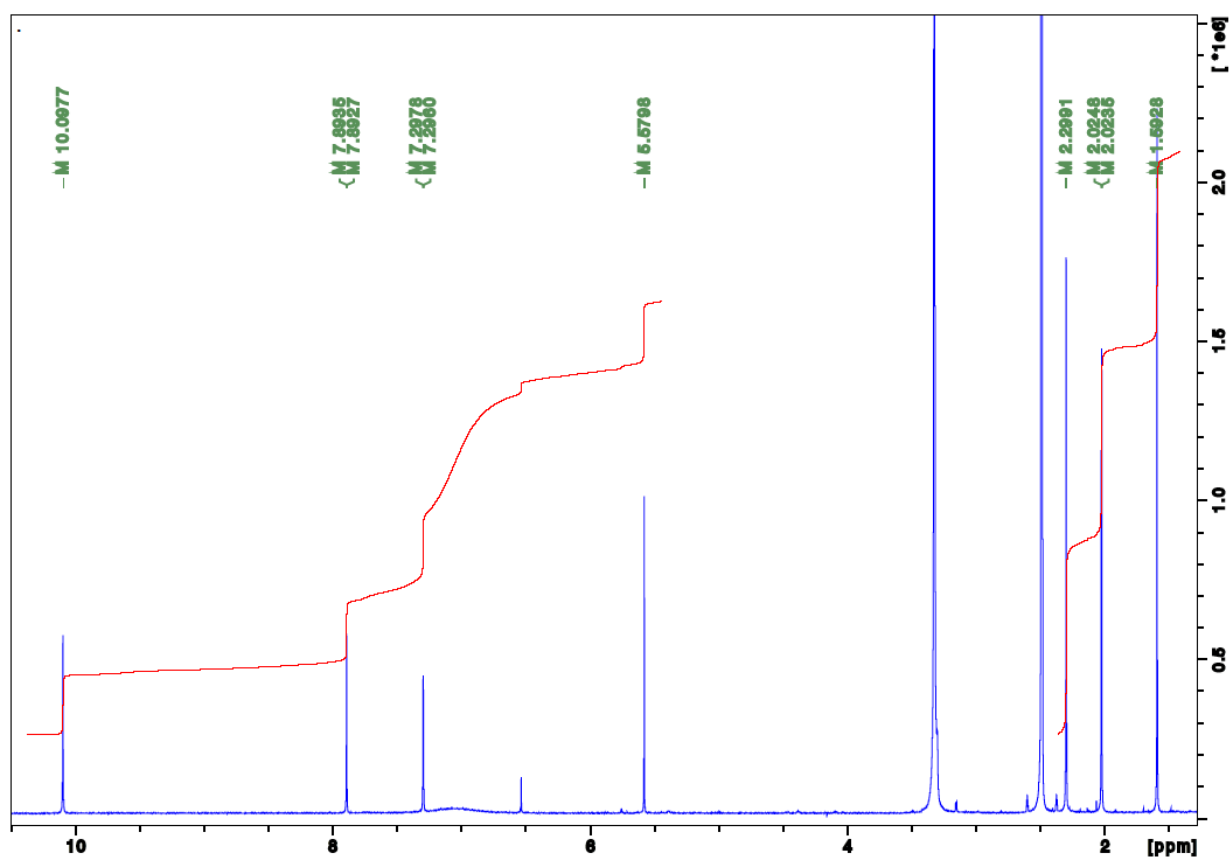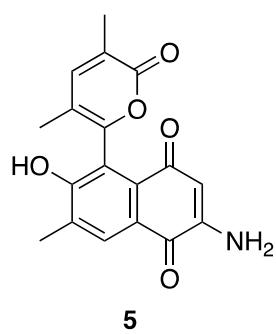

$^{13}\text{C}$  NMR Spectrum of Salinisporamine (**5**) recorded at 150 MHz in  $\text{DMSO-}d_6$

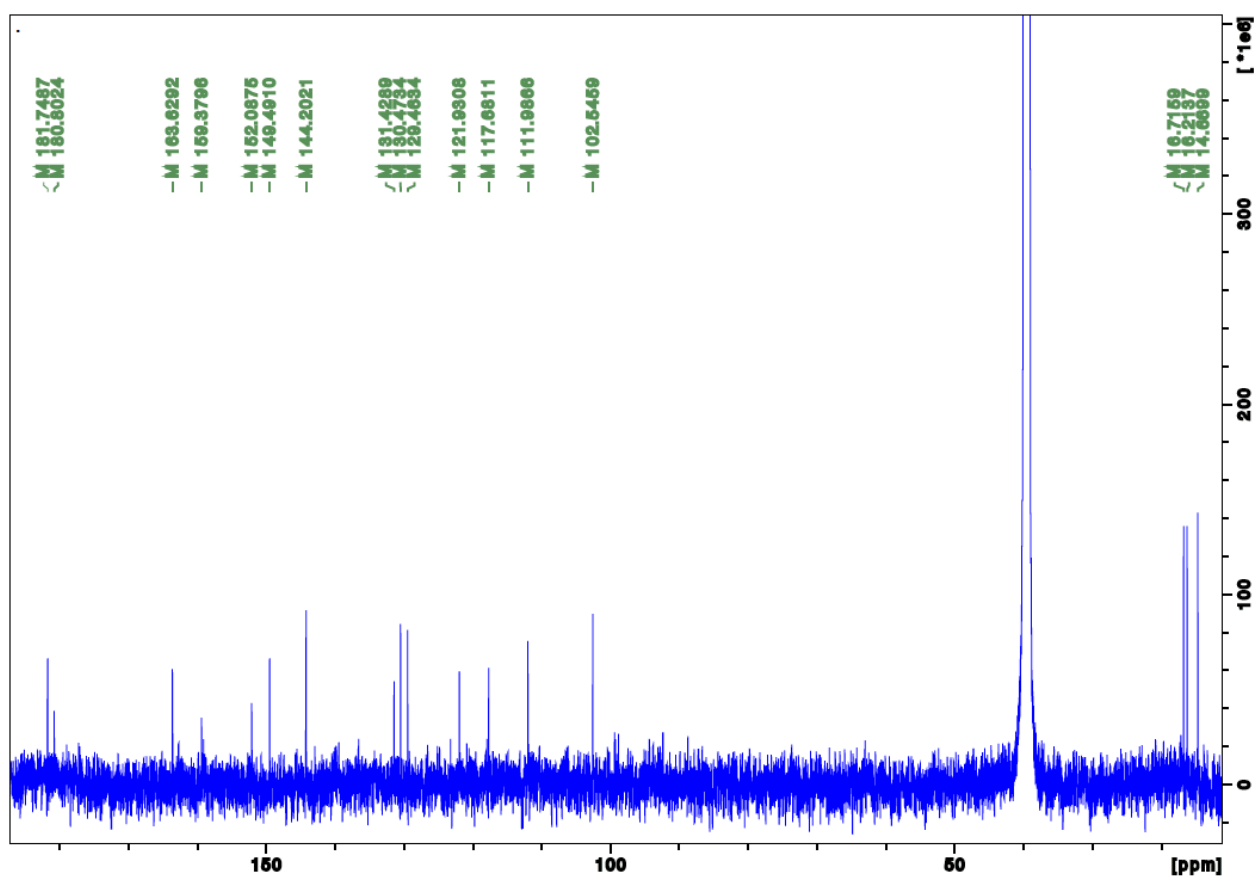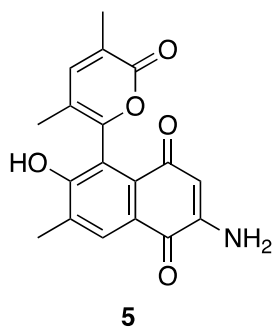

gradCOSY60 NMR Spectrum of Salinisporamine (**5**) recorded at 600 MHz in DMSO-*d*<sub>6</sub>

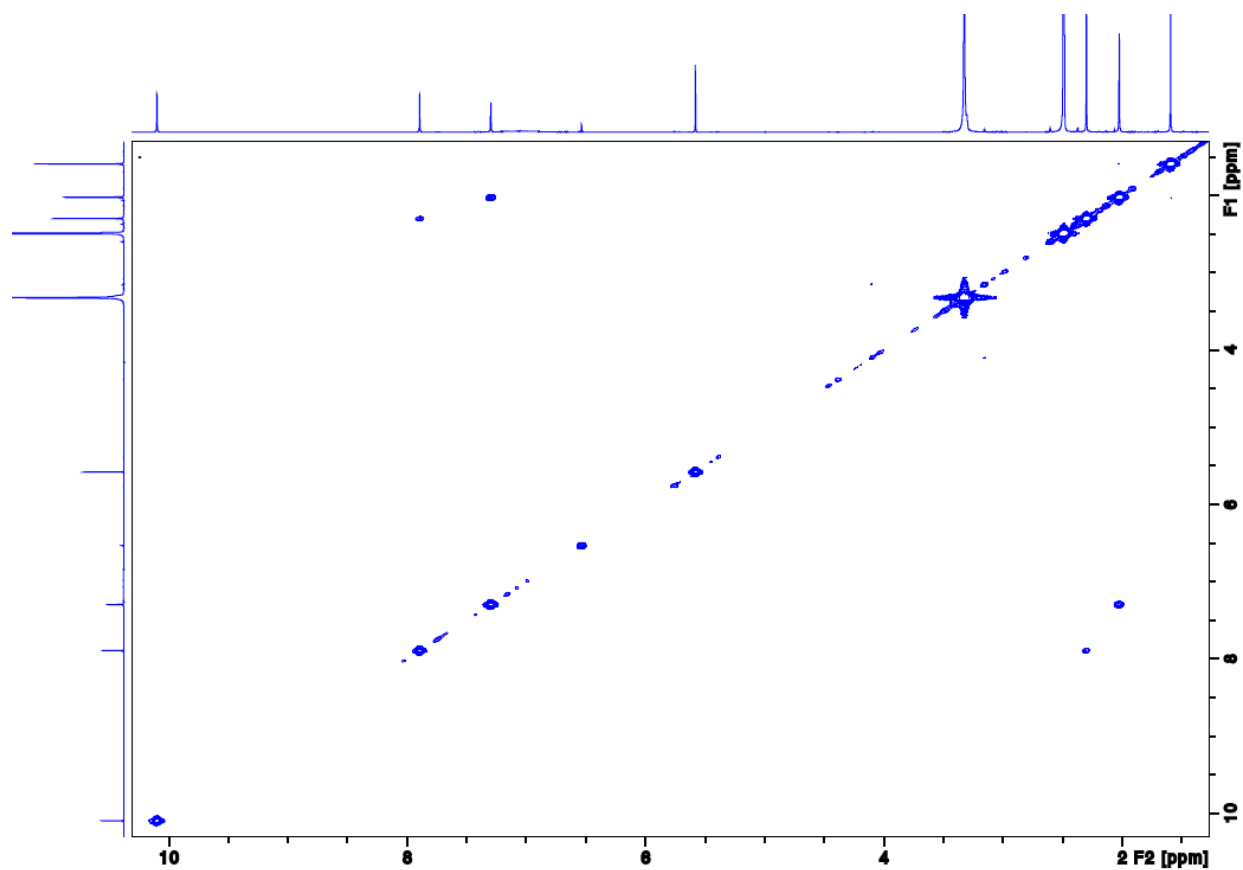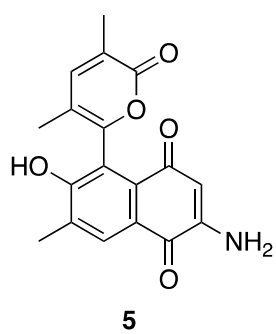

gradHSQC NMR Spectrum of Salinisporamine (**5**) recorded at 600 MHz in DMSO-*d*<sub>6</sub>

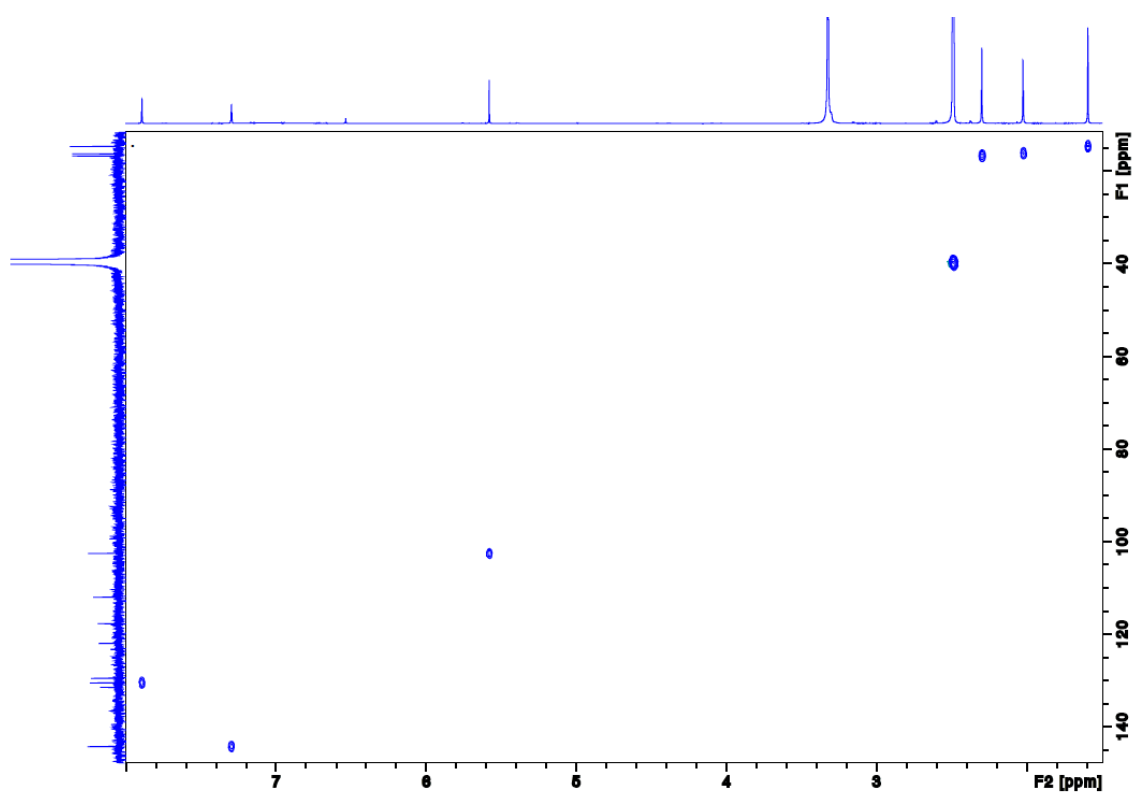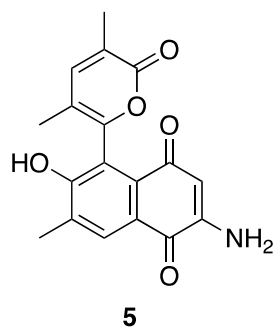



gradHMBC NMR Spectrum of Salinisporamine (**5**) recorded at 600 MHz in DMSO-*d*<sub>6</sub>

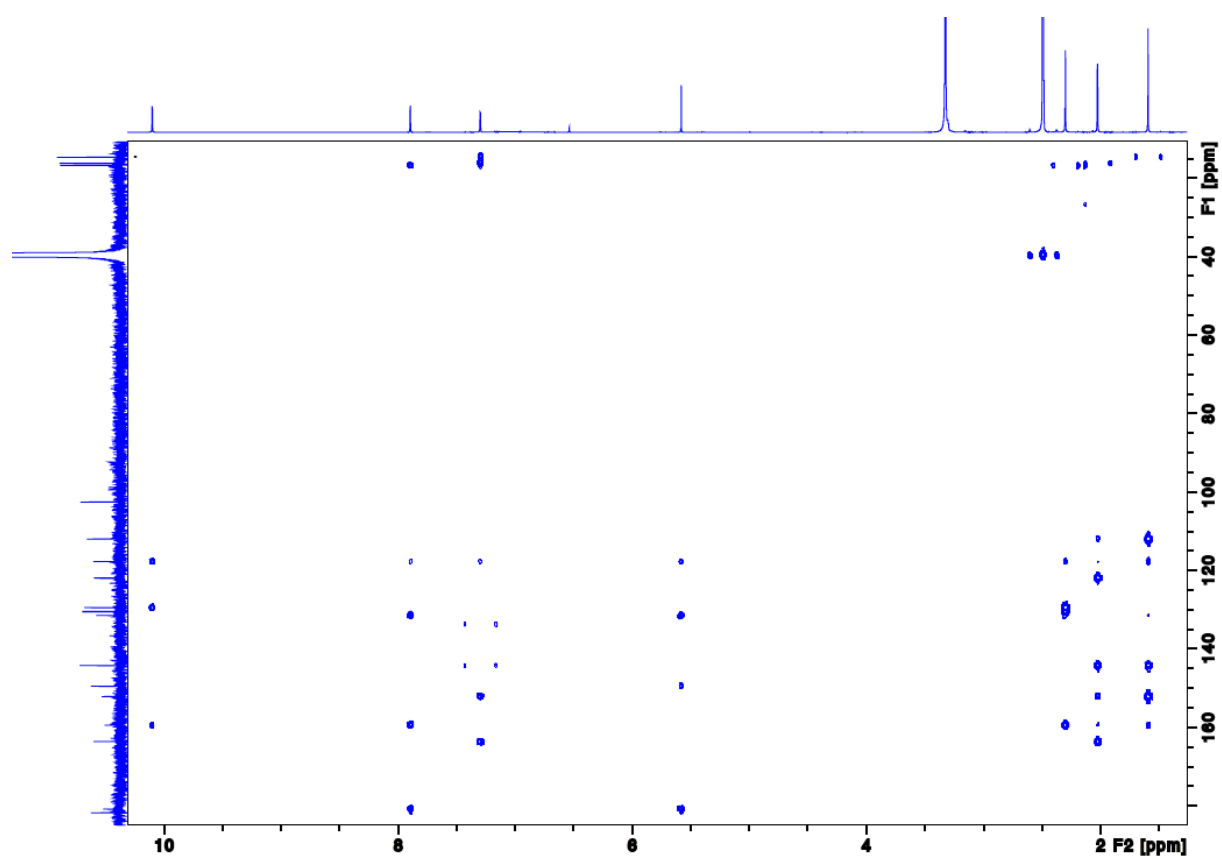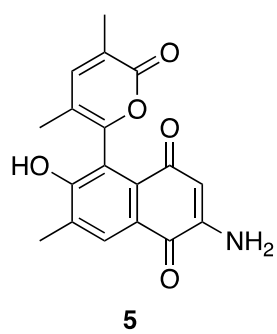

tROESY NMR Spectrum of Salinisporamine (**5**) recorded at 600 MHz in DMSO-*d*<sub>6</sub>

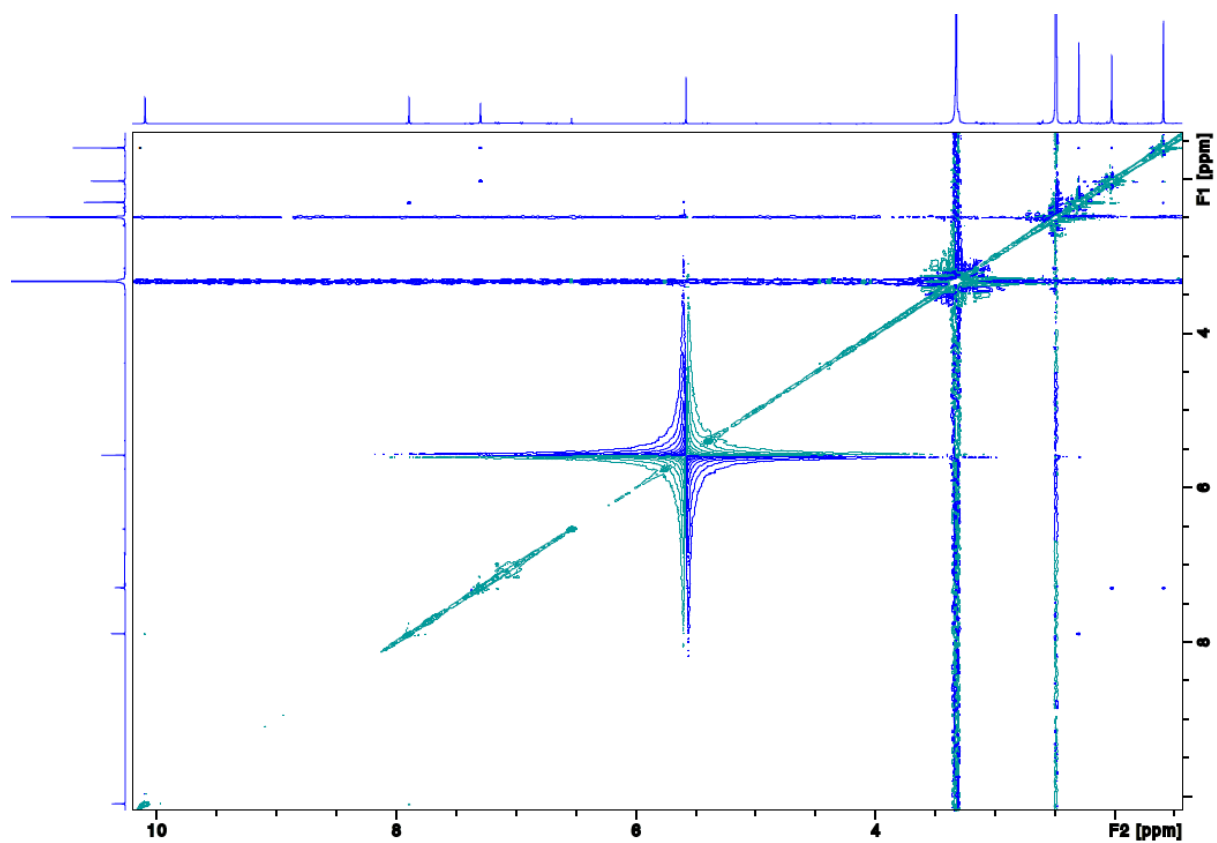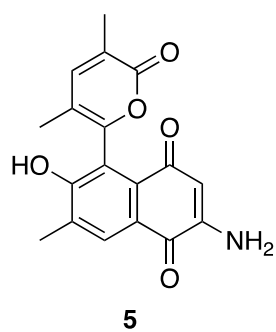

## Details of the X-ray Diffraction Analysis of Salinisporamine (5).

### Crystal Data and Experimental

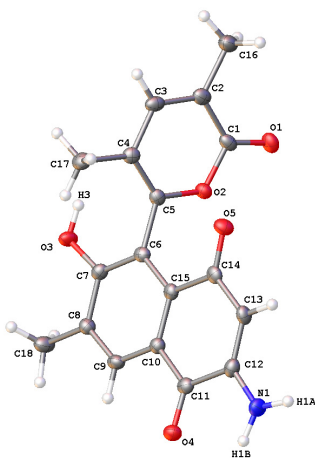

**Experimental.** Single orange blade-shaped crystals of salinisporamine (**5**) were recrystallised from methanol by slow evaporation. A suitable crystal ( $0.25 \times 0.10 \times 0.03$ ) mm<sup>3</sup> was selected and mounted on a mylar loop with oil on a Bruker APEX II area detector diffractometer. The crystal was kept at  $T = 90(2)$  K during data collection. Using **Olex2** (Dolomanov et al., 2009), the structure was solved with the XT (Sheldrick, 2015) structure solution program, using the Intrinsic Phasing solution method. The model was refined with version 2017/1 of **XL** (Sheldrick, 2015) using Least Squares minimisation.

**Crystal Data.** C<sub>18</sub>H<sub>15</sub>NO<sub>5</sub>,  $M_r = 325.31$ , monoclinic, P2<sub>1</sub>/c (No. 14),  $a = 13.7206(9)$  Å,  $b = 6.7934(5)$  Å,  $c = 16.8142(11)$  Å,  $\beta = 108.156(4)^\circ$ ,  $\alpha = \gamma = 90^\circ$ ,  $V = 1489.21(18)$  Å<sup>3</sup>,  $T = 90(2)$  K,  $Z = 4$ ,  $Z' = 1$ ,  $\mu(\text{CuK}\alpha) = 0.892$ , 9005 reflections measured, 2604 unique ( $R_{\text{int}} = 0.0366$ ) which were used in all calculations. The final  $wR_2$  was 0.1092 (all data) and  $R_I$  was 0.0403 ( $I > 2(I)$ ).

### Compound Salinisporamine (5)

|                                     |                                                 |
|-------------------------------------|-------------------------------------------------|
| Formula                             | C <sub>18</sub> H <sub>15</sub> NO <sub>5</sub> |
| $D_{\text{calc.}}/\text{g cm}^{-3}$ | 1.451                                           |
| $\mu/\text{mm}^{-1}$                | 0.892                                           |
| Formula Weight                      | 325.31                                          |
| Colour                              | orange                                          |
| Shape                               | blade                                           |
| Size/mm <sup>3</sup>                | $0.25 \times 0.10 \times 0.03$                  |
| $T/\text{K}$                        | 90(2)                                           |
| Crystal System                      | monoclinic                                      |
| Space Group                         | P2 <sub>1</sub> /c                              |
| $a/\text{\AA}$                      | 13.7206(9)                                      |
| $b/\text{\AA}$                      | 6.7934(5)                                       |
| $c/\text{\AA}$                      | 16.8142(11)                                     |
| $\alpha^\circ$                      | 90                                              |
| $\beta^\circ$                       | 108.156(4)                                      |
| $\gamma^\circ$                      | 90                                              |
| $V/\text{\AA}^3$                    | 1489.21(18)                                     |
| $Z$                                 | 4                                               |
| $Z'$                                | 1                                               |
| Wavelength/Å                        | 1.54178                                         |
| Radiation type                      | CuK $\alpha$                                    |
| $\theta_{\text{min}}/^\circ$        | 3.390                                           |
| $\theta_{\text{max}}/^\circ$        | 66.735                                          |
| Measured Refl.                      | 9005                                            |
| Independent Refl.                   | 2604                                            |
| Reflections Used                    | 2030                                            |
| $R_{\text{int}}$                    | 0.0366                                          |
| Parameters                          | 232                                             |
| Restraints                          | 0                                               |
| Largest Peak                        | 0.214                                           |
| Deepest Hole                        | -0.270                                          |
| GooF                                | 1.041                                           |
| $wR_2$ (all data)                   | 0.1092                                          |
| $wR_2$                              | 0.1006                                          |
| $R_I$ (all data)                    | 0.0563                                          |
| $R_I$                               | 0.0403                                          |

### Structure Quality Indicators

|              |            |       |             |      |                  |       |          |       |
|--------------|------------|-------|-------------|------|------------------|-------|----------|-------|
| Reflections: | d min (Cu) | 0.84  | I/ $\sigma$ | 14.8 | R <sub>int</sub> | 3.66% | complete | 99%   |
| Refinement:  | Shift      | 0.000 | Max Peak    | 0.2  | Min Peak         | -0.3  | Goof     | 1.041 |

An orange blade-shaped crystal with dimensions 0.25×0.10×0.03 mm<sup>3</sup> was mounted on a mylar loop with oil. X-ray diffraction data were collected using a Bruker APEX II area detector diffractometer equipped with an Oxford Cryosystems low-temperature device, operating at  $T = 90(2)$  K.

Data were measured using  $\omega$  scans of 2° per frame for 30 s using CuK $\alpha$  radiation (microfocus sealed X-ray tube, 45 kV, 0.60 mA). The total number of runs and images was based on the strategy calculation from the program APEX2. The maximum resolution achieved was  $\Theta = 66.735^\circ$ .

Cell parameters were retrieved using the SAINT (Bruker, V8.34A, after 2013) software and refined using SAINT (Bruker, V8.34A, after 2013) on 4576 reflections, 51 % of the observed reflections. Data reduction was performed using the SAINT (Bruker, V8.34A, after 2013) software which corrects for Lorentz polarisation. The final completeness is 98.80 % out to 66.735° in  $\Theta$ .

A multi-scan absorption correction was performed using SADABS-2014/5 (Bruker, 2014/5) was used for absorption correction.  $wR_2(\text{int})$  was 0.0586 before and 0.0480 after correction. The ratio of minimum to maximum transmission is 0.8996. The  $\lambda/2$  correction factor is 0.00150. The absorption coefficient  $\mu$  of this material is 0.892 mm<sup>-1</sup> at this wavelength ( $\lambda = 1.54178\text{\AA}$ ) and the minimum and maximum transmissions are 0.876 and 0.974.

The structure was solved in the space group P2<sub>1</sub>/c (# 14) by Intrinsic Phasing using the XT (Sheldrick, 2015) structure solution program and refined by Least Squares using version 2017/1 of XL (Sheldrick, 2015). All non-hydrogen atoms were refined anisotropically. All O—H and N—H hydrogen atoms were located in difference maps and refined isotropically. All other hydrogen atom positions were calculated geometrically and refined using the riding model.

*exptl\_absorpt\_process\_details*: SADABS-2014/5 (Bruker, 2014/5) was used for absorption correction.  $wR_2(\text{int})$  was 0.0586 before and 0.0480 after correction. The ratio of minimum to maximum transmission is 0.8996. The  $\lambda/2$  correction factor is 0.00150.

**Table S1:** Fractional Atomic Coordinates ( $\times 10^4$ ) and Equivalent Isotropic Displacement Parameters ( $\text{\AA}^2 \times 10^3$ ) for **ra144**.  $U_{eq}$  is defined as 1/3 of the trace of the orthogonalised  $U_{ij}$ .

| Atom | x          | y        | z          | $U_{eq}$ |
|------|------------|----------|------------|----------|
| O1   | 195.5(11)  | 8162(2)  | 1447.8(9)  | 23.9(4)  |
| O2   | 1275.9(11) | 9431(2)  | 2587.1(8)  | 18.3(3)  |
| O3   | 1502.0(11) | 11563(2) | 4645.9(9)  | 21.9(3)  |
| O4   | 5600.7(11) | 6756(2)  | 5321.3(9)  | 22.2(3)  |
| O5   | 3265.4(11) | 9828(2)  | 2429.6(8)  | 22.5(4)  |
| N1   | 6093.0(15) | 5936(3)  | 3952.6(12) | 23.6(4)  |
| C1   | 581.3(16)  | 9678(3)  | 1805.8(12) | 19.8(4)  |
| C2   | 369.8(16)  | 11658(3) | 1497.1(12) | 21.0(5)  |
| C3   | 864.8(16)  | 13158(3) | 1987.8(13) | 20.6(5)  |
| C4   | 1623.7(15) | 12853(3) | 2786.0(12) | 18.1(4)  |
| C5   | 1811.9(15) | 10984(3) | 3048.4(12) | 16.8(4)  |
| C6   | 2545.1(16) | 10246(3) | 3842.6(12) | 17.1(4)  |

| Atom | x          | y        | z          | $U_{eq}$ |
|------|------------|----------|------------|----------|
| C7   | 2315.4(16) | 10510(3) | 4589.1(13) | 18.0(4)  |
| C8   | 2916.1(16) | 9657(3)  | 5346.0(12) | 18.6(4)  |
| C9   | 3786.3(16) | 8641(3)  | 5342.3(12) | 19.3(5)  |
| C10  | 4054.7(15) | 8410(3)  | 4613.2(12) | 17.3(4)  |
| C11  | 5009.3(16) | 7359(3)  | 4659.5(13) | 19.2(5)  |
| C12  | 5254.0(16) | 7022(3)  | 3860.0(13) | 20.2(5)  |
| C13  | 4654.5(16) | 7843(3)  | 3131.6(12) | 20.0(5)  |
| C14  | 3760.2(16) | 8992(3)  | 3084.6(12) | 18.7(4)  |
| C15  | 3437.1(16) | 9201(3)  | 3855.1(12) | 16.9(4)  |
| C16  | -381.9(18) | 11955(3) | 643.7(13)  | 28.5(5)  |
| C17  | 2209.1(17) | 14568(3) | 3266.2(13) | 24.0(5)  |
| C18  | 2605.3(17) | 9831(3)  | 6123.1(13) | 25.5(5)  |

**Table S2:** Anisotropic Displacement Parameters ( $\times 10^4$ ) **ra144**. The anisotropic displacement factor exponent takes the form:  $-2\pi^2[h^2a^{*2} \times U_{11} + \dots + 2hka^* \times b^* \times U_{12}]$

| Atom | $U_{11}$ | $U_{22}$ | $U_{33}$ | $U_{23}$ | $U_{13}$ | $U_{12}$ |
|------|----------|----------|----------|----------|----------|----------|
| O1   | 18.1(8)  | 28.7(8)  | 22.8(7)  | -6.8(6)  | 3.1(6)   | -4.7(6)  |
| O2   | 15.5(8)  | 20.4(8)  | 17.1(7)  | -0.3(6)  | 2.5(6)   | -1.8(6)  |
| O3   | 17.1(8)  | 27.9(8)  | 20.4(7)  | 3.1(6)   | 5.5(6)   | 7.8(6)   |
| O4   | 19.2(8)  | 23.7(8)  | 21.1(7)  | 0.6(6)   | 2.6(6)   | 2.0(6)   |
| O5   | 20.9(8)  | 29.0(8)  | 17.7(7)  | 3.7(6)   | 6.0(6)   | 0.8(6)   |
| N1   | 21.8(11) | 27.4(10) | 23(1)    | -1.7(8)  | 8.8(9)   | 5.7(8)   |
| C1   | 14.3(11) | 29.7(12) | 15.2(10) | -0.9(9)  | 4.0(8)   | -0.2(9)  |
| C2   | 16.0(11) | 28.8(12) | 19.6(10) | 1.2(9)   | 7.5(9)   | 3.7(9)   |
| C3   | 16.9(11) | 25.1(11) | 21.9(10) | 5.8(9)   | 9.0(9)   | 5.4(9)   |
| C4   | 14.1(11) | 20.7(11) | 20.5(10) | 1.3(8)   | 6.9(9)   | -0.6(8)  |
| C5   | 12.8(11) | 20.6(10) | 17.5(10) | -1.4(8)  | 5.4(8)   | -1.6(8)  |
| C6   | 15.7(11) | 15.3(10) | 18.9(10) | 0.7(8)   | 3.5(9)   | -3.4(8)  |
| C7   | 13.4(10) | 18.2(10) | 22.4(10) | -0.5(8)  | 5.3(9)   | -0.4(8)  |
| C8   | 18.7(11) | 19.4(11) | 18(1)    | 0.4(8)   | 6.0(9)   | -1.1(8)  |
| C9   | 17.1(11) | 18.7(11) | 18.9(10) | 1.3(8)   | 0.9(9)   | -0.3(8)  |
| C10  | 15.8(11) | 16.5(10) | 19(1)    | -1.3(8)  | 4.6(8)   | -1.6(8)  |
| C11  | 18.1(11) | 15.8(10) | 22.1(11) | -0.8(8)  | 3.8(9)   | -2.9(8)  |
| C12  | 17.8(11) | 18.6(11) | 25.1(11) | -4.2(8)  | 8.0(9)   | -1.5(8)  |
| C13  | 18.7(11) | 24.5(11) | 18.3(10) | -4.6(8)  | 7.9(9)   | -2.3(9)  |
| C14  | 17.7(11) | 17.6(11) | 19.4(10) | -3.6(8)  | 3.8(9)   | -6.4(8)  |
| C15  | 15.7(11) | 15.8(10) | 18.4(10) | -2.9(8)  | 4.2(9)   | -3.4(8)  |
| C16  | 27.7(13) | 33.7(13) | 21.2(11) | 0.3(9)   | 3.5(10)  | 8.4(10)  |
| C17  | 25.5(13) | 18.4(11) | 26.4(11) | 1.9(9)   | 5.6(10)  | -0.7(9)  |
| C18  | 23.5(12) | 32.9(13) | 20.7(11) | 5.3(9)   | 7.9(10)  | 6.7(10)  |

**Table S3:** Bond Lengths in Å for **ra144**.

| Atom | Atom | Length/Å | Atom | Atom | Length/Å |
|------|------|----------|------|------|----------|
| O1   | C1   | 1.227(2) | C5   | C6   | 1.487(3) |
| O2   | C1   | 1.372(2) | C6   | C7   | 1.397(3) |
| O2   | C5   | 1.378(2) | C6   | C15  | 1.409(3) |
| O3   | C7   | 1.354(2) | C7   | C8   | 1.407(3) |
| O4   | C11  | 1.225(2) | C8   | C9   | 1.381(3) |
| O5   | C14  | 1.237(2) | C8   | C18  | 1.500(3) |
| N1   | C12  | 1.335(3) | C9   | C10  | 1.394(3) |
| C1   | C2   | 1.439(3) | C10  | C11  | 1.472(3) |
| C2   | C3   | 1.353(3) | C10  | C15  | 1.399(3) |
| C2   | C16  | 1.497(3) | C11  | C12  | 1.501(3) |
| C3   | C4   | 1.434(3) | C12  | C13  | 1.364(3) |
| C4   | C5   | 1.343(3) | C13  | C14  | 1.436(3) |
| C4   | C17  | 1.500(3) | C14  | C15  | 1.501(3) |

**Table S4:** Bond Angles in ° for **ra144**.

| Atom | Atom | Atom | Angle/°    | Atom | Atom | Atom | Angle/°    |
|------|------|------|------------|------|------|------|------------|
| C1   | O2   | C5   | 122.34(16) | C7   | C8   | C18  | 120.66(19) |
| O1   | C1   | O2   | 115.61(18) | C9   | C8   | C7   | 117.71(18) |
| O1   | C1   | C2   | 126.90(19) | C9   | C8   | C18  | 121.62(19) |
| O2   | C1   | C2   | 117.48(18) | C8   | C9   | C10  | 121.72(19) |
| C1   | C2   | C16  | 118.24(19) | C9   | C10  | C11  | 118.84(18) |
| C3   | C2   | C1   | 118.54(19) | C9   | C10  | C15  | 120.45(19) |
| C3   | C2   | C16  | 123.2(2)   | C15  | C10  | C11  | 120.70(18) |
| C2   | C3   | C4   | 122.8(2)   | O4   | C11  | C10  | 122.45(19) |
| C3   | C4   | C17  | 120.15(18) | O4   | C11  | C12  | 119.51(19) |
| C5   | C4   | C3   | 116.95(19) | C10  | C11  | C12  | 118.05(18) |
| C5   | C4   | C17  | 122.80(19) | N1   | C12  | C11  | 113.92(19) |
| O2   | C5   | C6   | 109.89(16) | N1   | C12  | C13  | 125.99(19) |
| C4   | C5   | O2   | 121.65(18) | C13  | C12  | C11  | 120.07(19) |
| C4   | C5   | C6   | 128.41(18) | C12  | C13  | C14  | 122.54(19) |
| C7   | C6   | C5   | 118.99(18) | O5   | C14  | C13  | 121.41(19) |
| C7   | C6   | C15  | 119.27(18) | O5   | C14  | C15  | 119.83(19) |
| C15  | C6   | C5   | 121.65(18) | C13  | C14  | C15  | 118.75(18) |
| O3   | C7   | C6   | 123.54(18) | C6   | C15  | C14  | 121.55(18) |
| O3   | C7   | C8   | 114.64(18) | C10  | C15  | C6   | 118.92(18) |
| C6   | C7   | C8   | 121.80(19) | C10  | C15  | C14  | 119.48(18) |

**Table S5:** Torsion Angles in ° for **ra144**.

| Atom | Atom | Atom | Atom | Angle/°     |
|------|------|------|------|-------------|
| O1   | C1   | C2   | C3   | 179.2(2)    |
| O1   | C1   | C2   | C16  | -1.3(3)     |
| O2   | C1   | C2   | C3   | 0.2(3)      |
| O2   | C1   | C2   | C16  | 179.67(17)  |
| O2   | C5   | C6   | C7   | -104.7(2)   |
| O2   | C5   | C6   | C15  | 72.0(2)     |
| O3   | C7   | C8   | C9   | -176.95(18) |
| O3   | C7   | C8   | C18  | 3.9(3)      |
| O4   | C11  | C12  | N1   | 4.5(3)      |
| O4   | C11  | C12  | C13  | -173.8(2)   |
| O5   | C14  | C15  | C6   | 3.5(3)      |
| O5   | C14  | C15  | C10  | -173.90(19) |
| N1   | C12  | C13  | C14  | 179.9(2)    |
| C1   | O2   | C5   | C4   | 5.4(3)      |
| C1   | O2   | C5   | C6   | -176.79(16) |
| C1   | C2   | C3   | C4   | 2.8(3)      |
| C2   | C3   | C4   | C5   | -1.9(3)     |
| C2   | C3   | C4   | C17  | 174.7(2)    |
| C3   | C4   | C5   | O2   | -2.2(3)     |
| C3   | C4   | C5   | C6   | -179.58(19) |
| C4   | C5   | C6   | C7   | 72.9(3)     |
| C4   | C5   | C6   | C15  | -110.4(2)   |
| C5   | O2   | C1   | O1   | 176.58(17)  |
| C5   | O2   | C1   | C2   | -4.3(3)     |
| C5   | C6   | C7   | O3   | -6.2(3)     |
| C5   | C6   | C7   | C8   | 172.79(19)  |
| C5   | C6   | C15  | C10  | -175.02(18) |
| C5   | C6   | C15  | C14  | 7.6(3)      |
| C6   | C7   | C8   | C9   | 4.0(3)      |

| Atom | Atom | Atom | Atom | Angle/°     |
|------|------|------|------|-------------|
| C6   | C7   | C8   | C18  | -175.16(19) |
| C7   | C6   | C15  | C10  | 1.7(3)      |
| C7   | C6   | C15  | C14  | -175.72(18) |
| C7   | C8   | C9   | C10  | -1.7(3)     |
| C8   | C9   | C10  | C11  | 178.23(19)  |
| C8   | C9   | C10  | C15  | -0.5(3)     |
| C9   | C10  | C11  | O4   | -3.4(3)     |
| C9   | C10  | C11  | C12  | 176.47(18)  |
| C9   | C10  | C15  | C6   | 0.5(3)      |
| C9   | C10  | C15  | C14  | 177.95(18)  |
| C10  | C11  | C12  | N1   | -175.39(18) |
| C10  | C11  | C12  | C13  | 6.3(3)      |
| C11  | C10  | C15  | C6   | -178.17(18) |
| C11  | C10  | C15  | C14  | -0.7(3)     |
| C11  | C12  | C13  | C14  | -2.0(3)     |
| C12  | C13  | C14  | O5   | 175.3(2)    |
| C12  | C13  | C14  | C15  | -3.7(3)     |
| C13  | C14  | C15  | C6   | -177.56(18) |
| C13  | C14  | C15  | C10  | 5.1(3)      |
| C15  | C6   | C7   | O3   | 177.03(18)  |
| C15  | C6   | C7   | C8   | -4.0(3)     |
| C15  | C10  | C11  | O4   | 175.33(19)  |
| C15  | C10  | C11  | C12  | -4.8(3)     |
| C16  | C2   | C3   | C4   | -176.61(19) |
| C17  | C4   | C5   | O2   | -178.73(18) |
| C17  | C4   | C5   | C6   | 3.9(3)      |
| C18  | C8   | C9   | C10  | 177.4(2)    |

**Table S6:** Hydrogen Fractional Atomic Coordinates ( $\times 10^4$ ) and Equivalent Isotropic Displacement Parameters ( $\text{\AA}^2 \times 10^3$ ) for **ra144**.  $U_{eq}$  is defined as 1/3 of the trace of the orthogonalised  $U_{ij}$ .

| Atom | x        | y         | z        | $U_{eq}$ |
|------|----------|-----------|----------|----------|
| H3   | 1120(20) | 12030(40) | 4150(18) | 51(9)    |
| H1A  | 6297(19) | 5570(30)  | 3494(15) | 31(7)    |
| H1B  | 6450(20) | 5560(40)  | 4487(16) | 33(7)    |
| H3A  | 702.67   | 14469.03  | 1795.48  | 25       |
| H9   | 4213.24  | 8084.55   | 5849.68  | 23       |
| H13  | 4835.64  | 7647.06   | 2636.19  | 24       |
| H16A | -535.44  | 13361.41  | 551.26   | 43       |
| H16B | -1014.98 | 11234.83  | 600.81   | 43       |
| H16C | -87.24   | 11464.68  | 220.44   | 43       |
| H17A | 2531.92  | 14186.33  | 3851.47  | 36       |
| H17B | 1738.4   | 15669.36  | 3239.48  | 36       |
| H17C | 2739.53  | 14970.21  | 3021.27  | 36       |
| H18A | 2537.41  | 11224.93  | 6247.18  | 38       |
| H18B | 3128.68  | 9218.19   | 6593.29  | 38       |
| H18C | 1946.82  | 9165.23   | 6036.6   | 38       |

**Table S7:** Hydrogen Bond information for **ra144**.

| D  | H   | A               | d(D-H)/\AA | d(H-A)/\AA | d(D-A)/\AA | D-H-A/deg |
|----|-----|-----------------|------------|------------|------------|-----------|
| O3 | H3  | O1 <sup>1</sup> | 0.89(3)    | 1.94(3)    | 2.705(2)   | 144(3)    |
| N1 | H1A | O5 <sup>2</sup> | 0.93(2)    | 1.90(3)    | 2.832(2)   | 179(2)    |

<sup>1</sup>-x,1/2+y,1/2-z; <sup>2</sup>1-x,-1/2+y,1/2-z

**Citations**

Dolomanov, O.V.; Bourhis, L.J.; Gildea, R.J.; Howard, J.A.K.; Puschmann, H. Olex2: A complete structure solution, refinement and analysis program, *J. Appl. Cryst.*, **2009**, *42*, 339-341.

Sheldrick, G.M. XT, *Acta Cryst.*, **2015**, *A71*, 3-8.

Sheldrick, G.M. XL, *Acta Cryst.*, **2015**, *C71*, 3-8.

Software for the Integration of CCD Detector System Bruker Analytical X-ray Systems, Bruker axs, Madison, WI (after 2013).



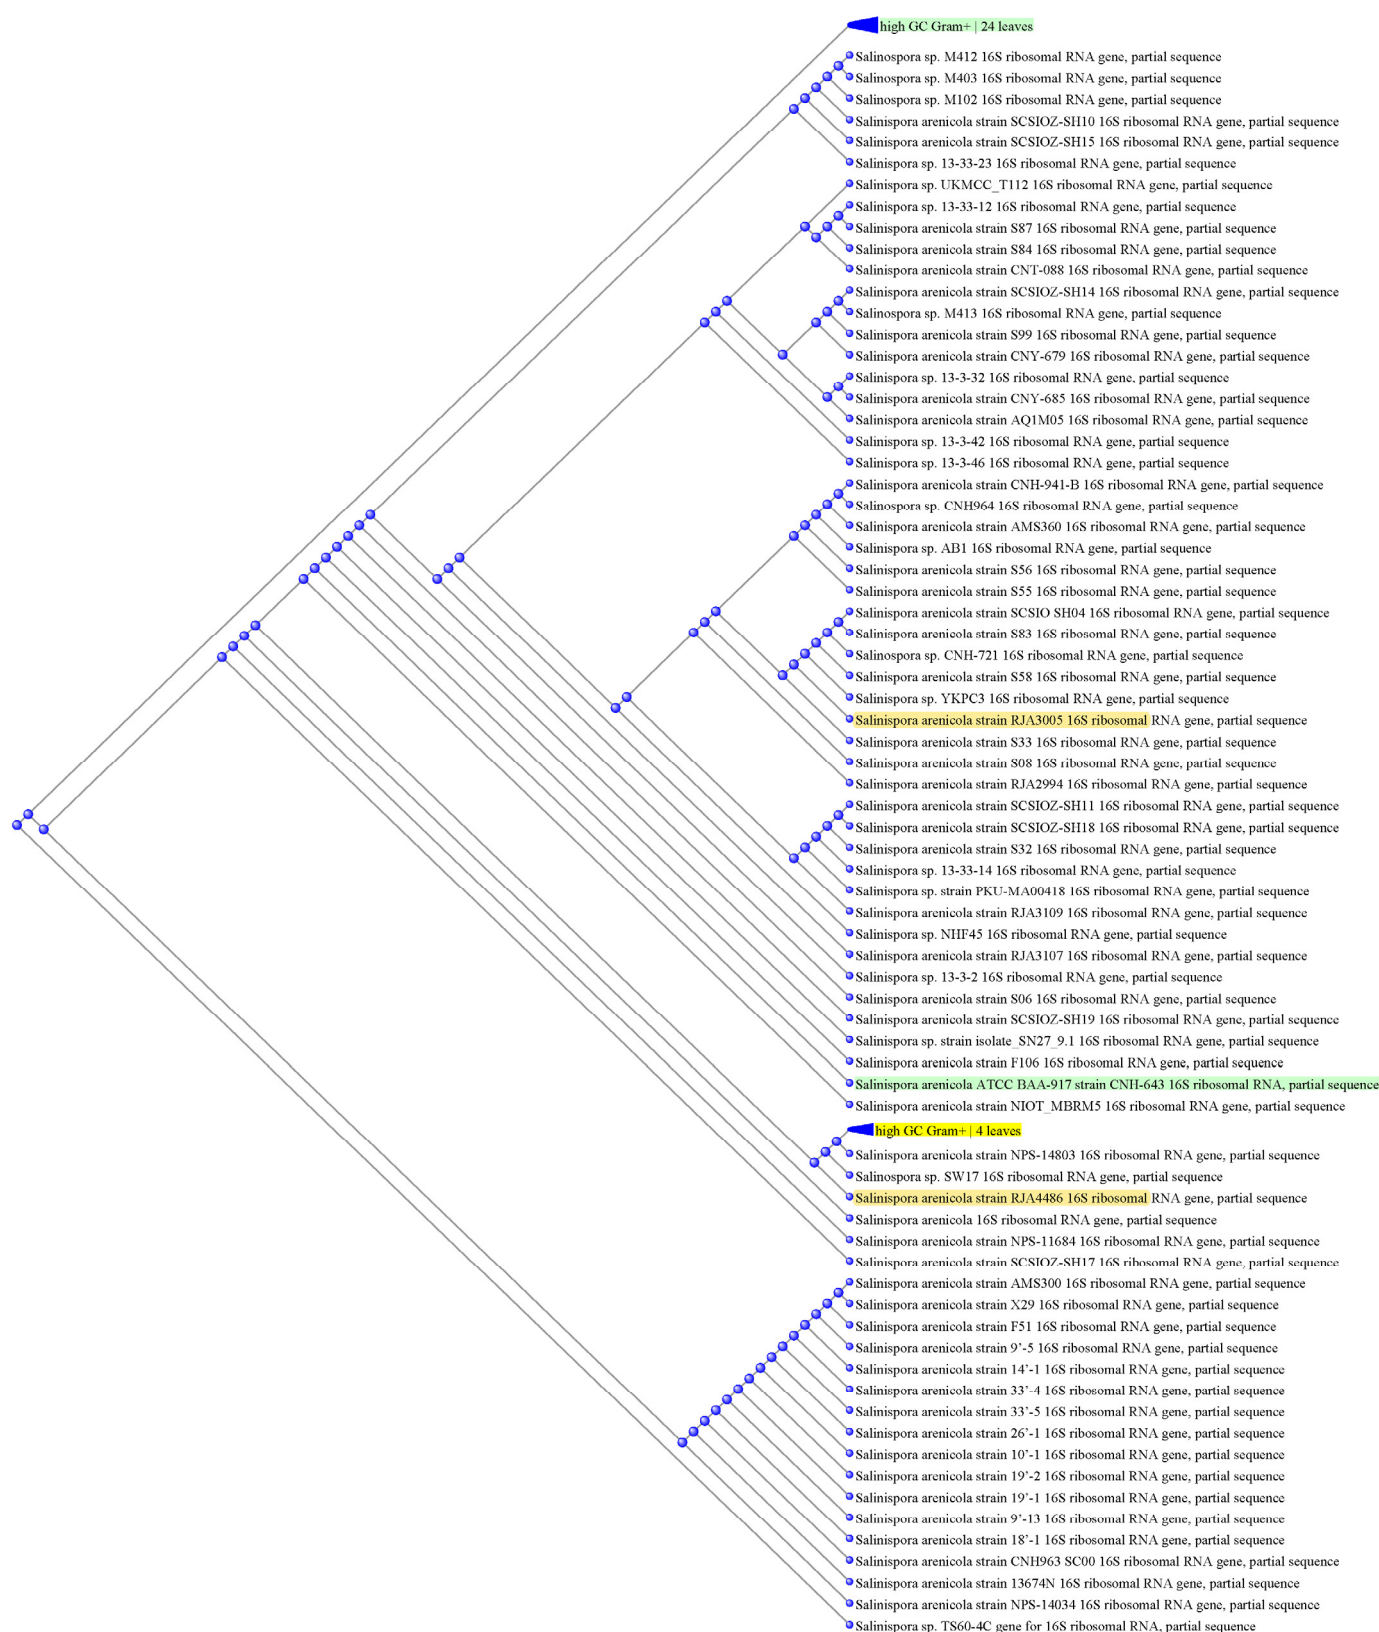

Phylogenetic Tree constructed from all deposited *Salinispora* 16S RNA sequences. The Fast Minimum Evolution Tree Method was used with 0.75 maximum sequence difference.

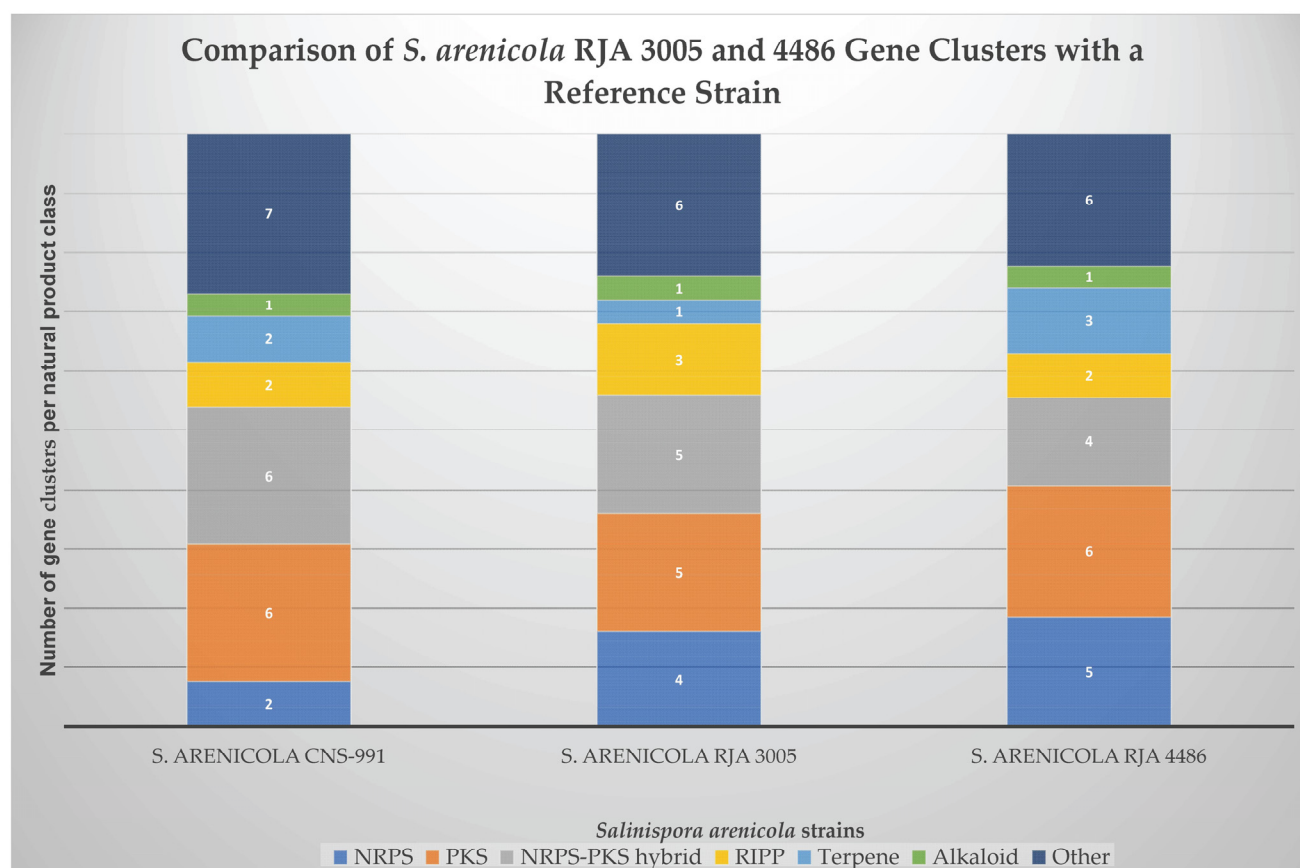

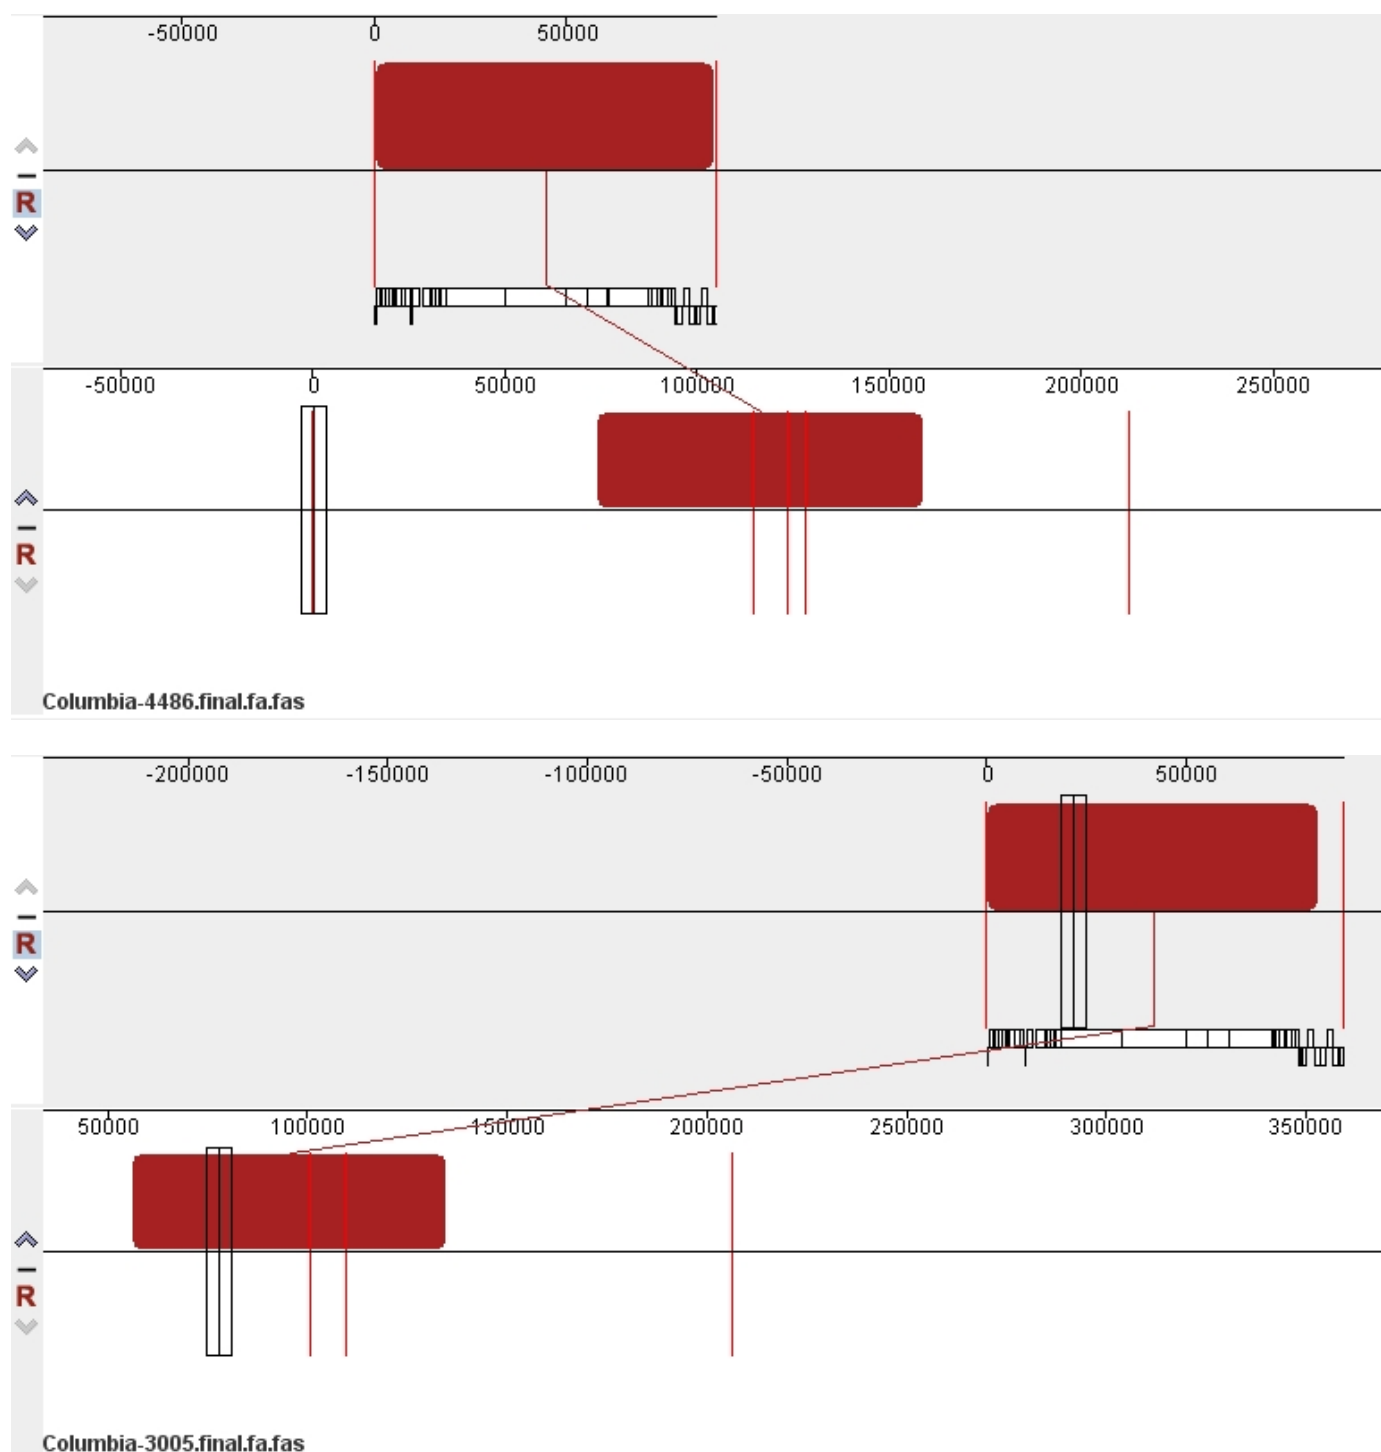

Mauve alignments with the *S. arenicola* CNS-205 rifamycin gene cluster extracted from antiSMASH. The contigs containing partial rifamycin gene clusters of *S. arenicola* RJA 4486 and RJA 3005 were reorganized in alignment with the complete gene cluster.
